# Supplementary material for: The location and translocation of ndh genes of chloroplast origin in the Orchidaceae family
Source: PubMed Central journal article supplement (PMC4356964; doi:10.1038/srep09040), 2015-03-12

## Supplementary Information

### The location and translocation of *ndh* genes of chloroplast origin in the Orchidaceae family

Choun-Sea Lin<sup>1,§,\*</sup>, Jeremy J.W. Chen<sup>2,\*</sup>, Yao-Ting Huang<sup>3,\*</sup>, Ming-Tsair Chan<sup>1,4,\*</sup>, Henry Daniell<sup>5,\*</sup>, Wan-Jung Chang<sup>1,\*</sup>, Chen-Tran Hsu<sup>1</sup>, De-Chih Liao<sup>1</sup>, Fu-Huei Wu<sup>1</sup>, Sheng-Yi Lin<sup>2</sup>, Chen-Fu Liao<sup>3</sup>, Michael K. Deyholos<sup>6</sup>, Gane Ka-Shu Wong<sup>6,7,8</sup>, Victor A. Albert<sup>9</sup>, Ming-Lun Chou<sup>10</sup>, Chun-Yi Chen<sup>1</sup>, and Ming-Che Shih<sup>1,§</sup>

<sup>1</sup>Agricultural Biotechnology Research Center, Academia Sinica, Taipei, Taiwan

<sup>2</sup>Institute of Biomedical Sciences, National Chung-Hsing University, Taichung, Taiwan

<sup>3</sup>Department of Computer Science and Information Engineering, National Chung Cheng University, Chiayi, Taiwan

<sup>4</sup>Academia Sinica Biotechnology Center in Southern Taiwan, Tainan, Taiwan

<sup>5</sup>Departments of Biochemistry and Pathology, University of Pennsylvania School of Dental Medicine, Philadelphia, PA, USA

<sup>6</sup>Department of Biological Sciences, University of Alberta, Edmonton, AB, Canada

<sup>7</sup>Department of Medicine, University of Alberta, Edmonton AB, Canada

<sup>8</sup>BGI-Shenzhen, Beishan Industrial Zone, Yantian District, Shenzhen, China

<sup>9</sup>Department of Biological Sciences, University at Buffalo, Buffalo, NY, USA

<sup>10</sup>Department of Life Sciences, Tzu Chi University, Hualien, Taiwan

\*These authors contributed equally to this work

§Corresponding author

MCS: mcshih@gate.sinica.edu.tw

CSL: cslin99@gate.sinica.edu.tw

## Table of Contents

|                                                                                                                                                                                                                                                                                                                                                                                                                                                      |         |
|------------------------------------------------------------------------------------------------------------------------------------------------------------------------------------------------------------------------------------------------------------------------------------------------------------------------------------------------------------------------------------------------------------------------------------------------------|---------|
| <b>Supplementary Table S1.</b> Percentage of each <i>ndh</i> gene remaining within the transcriptomes of 16 orchid species.                                                                                                                                                                                                                                                                                                                          | Page 3  |
| <b>Supplementary Table S2.</b> The orchid <i>ndh</i> sequence IDs in transcriptome databases.                                                                                                                                                                                                                                                                                                                                                        | Page 4  |
| <b>Supplementary Table S3.</b> Plant cp <i>ndh</i> genes and their transfer to plant mt genomes.                                                                                                                                                                                                                                                                                                                                                     | Page 9  |
| <b>Supplementary Table S4.</b> The accession numbers of the sequences that were identified in this report.                                                                                                                                                                                                                                                                                                                                           | Page 10 |
| <b>Supplementary Table S5.</b> Sequencing coverage of the seven assembled chloroplast genomes.                                                                                                                                                                                                                                                                                                                                                       | Page 12 |
| <b>Supplementary Table S6.</b> Summary of the transcriptome, chloroplast and mitochondrial genome sequences of <i>Vanilla planifolia</i> ( <i>ndh</i> -deleted), <i>Paphiopedilum armeniacum</i> ( <i>ndh</i> -deleted), <i>Cypripedium formosanum</i> ( <i>ndh</i> -complete), <i>Habenaria longidenticulata</i> , <i>Goodyera fumata</i> , <i>Erycina pusilla</i> ( <i>ndh</i> -deleted) and <i>Masdevallia picturata</i> ( <i>ndh</i> -complete). | Page 13 |
| <b>Supplemental Table S7.</b> Mitochondrial-derived <i>ndh</i> transcripts.                                                                                                                                                                                                                                                                                                                                                                          | Page 14 |
| <b>Supplementary Table S8.</b> Summary of 68 cp-like mt gene fragments.                                                                                                                                                                                                                                                                                                                                                                              | Page 15 |
| <b>Supplementary Table S9.</b> Mitochondria and chloroplast genome accession numbers in identifying the <i>ndh</i> genes and cp-like DNA from the published plant mt genomes.                                                                                                                                                                                                                                                                        | Page 17 |
| <b>Supplementary Table S10.</b> Primer list for BAC clone screening.                                                                                                                                                                                                                                                                                                                                                                                 | Page 18 |
| <b>Supplemental Figure S1.</b> Gene maps of orchid chloroplast genomes.                                                                                                                                                                                                                                                                                                                                                                              | Page 19 |
| <b>Supplementary Figure S2.</b> The cp <i>ndhJ-K-C</i> genes were transferred to the plant mt genome.                                                                                                                                                                                                                                                                                                                                                | Page 22 |
| <b>Supplementary Figure S3.</b> The cp <i>ndhF-D-E-G-I-A-H</i> region was transferred to the plant mt genome.                                                                                                                                                                                                                                                                                                                                        | Page 23 |
| <b>Supplementary Figure S4.</b> The cp <i>ndhB</i> gene fragment was transferred to the plant mt genome.                                                                                                                                                                                                                                                                                                                                             | Page 24 |
| <b>Supplementary Figure S5.</b> Flowchart of sequence annotation.                                                                                                                                                                                                                                                                                                                                                                                    | Page 25 |

**Supplementary Table S1. Percentage of each *ndh* gene remaining within the transcriptomes of 16 orchid species.<sup>1</sup>**

| <i>ndh</i> gene*                | F  | D   | E   | G   | I   | A  | H   | J   | K   | C   | B   |
|---------------------------------|----|-----|-----|-----|-----|----|-----|-----|-----|-----|-----|
| <b>Apostasioideae</b>           |    |     |     |     |     |    |     |     |     |     |     |
| <i>Apostasia shenzhenica</i>    | -  | 96  | -   | -   | 80  | 40 | -   | 64  | 86  | 100 | 34  |
| <i>Neuwiedia malipoensis</i>    | 62 | 100 | 84  | 40  | 83  | 78 | 83  | 31  | -   | 100 | 96  |
| <b>Vanilloideae</b>             |    |     |     |     |     |    |     |     |     |     |     |
| <i>Vanilla shenzhenica</i>      | -  | -   | -   | -   | -   | -  | -   | -   | 35  | -   | 8   |
| <i>Galeola faberi</i>           | -  | -   | -   | -   | -   | 16 | -   | -   | -   | 40  | 6   |
| <i>Vanilla planifolia</i>       | -  | -   | -   | -   | -   | -  | -   | 25  | 15  | 44  | 8   |
| <b>Cypripedioideae</b>          |    |     |     |     |     |    |     |     |     |     |     |
| <i>Cypripedium singchii</i>     | 7  | 94  | 100 | 94  | 83  | 8  | 74  | 98  | 98  | 100 | 65  |
| <i>Paphiopedilum armeniacum</i> | -  | 30  | -   | -   | -   | 6  | 80  | 100 | 100 | 100 | 62  |
| <b>Orchidoideae</b>             |    |     |     |     |     |    |     |     |     |     |     |
| <i>Hemipilia forrestii</i>      | 58 | 71  | 64  | 46  | 100 | 76 | 78  | -   | 4   | -   | 44  |
| <i>Habenaria delavayi</i>       | 50 | 84  | 100 | 100 | 100 | 88 | 58  | -   | 89  | 100 | 96  |
| <i>Drakaea elastica</i>         | -  | 20  | -   | -   | -   | -  | -   | -   | 76  | -   | 22  |
| <i>Goodyera pubescens</i>       | 50 | 80  | 100 | 100 | 94  | 91 | 100 | 100 | 91  | 100 | 16  |
| <i>Platanthera clavellata</i>   | 25 | 87  | 10  | 82  | 94  | 92 | 100 | 98  | 91  | 100 | 64  |
| <b>Epidendroideae</b>           |    |     |     |     |     |    |     |     |     |     |     |
| <i>Masdevallia yuangensis</i>   | 67 | 79  | 82  | 72  | 68  | 44 | 88  | 100 | 100 | 100 | 100 |
| <i>Phalaenopsis equestris</i>   | 10 | 30  | -   | 24  | 20  | -  | -   | 96  | 26  | 58  | 74  |
| <i>Cymbidium sinense</i>        | 79 | 100 | 42  | 84  | 100 | 90 | 100 | 100 | 94  | 91  | 94  |
| <i>Erycina pusilla</i>          | -  | 22  | -   | 44  | -   | -  | -   | 47  | -   | 91  | 26  |

<sup>1</sup>No. of aligned amino acids/no. of total amino acids. The sequence IDs are shown in Supplementary Table S2.

\*The percentage amino acid identity is in comparison with the corresponding *ndh* gene that was translated from banana.

‘-’ indicates genes that were not found in the transcriptome of a species.

**Supplementary Table S2. The orchid ndh sequence IDs in transcriptome databases.**

| Species                      | <i>ndh</i> transcripts                                                                                                                                                                                      |                                                                                                                                                                                                                                                                                                                                                                                                                                                                                                                                                                                |                                                                                                                                                                                         | Material information | Reference        |
|------------------------------|-------------------------------------------------------------------------------------------------------------------------------------------------------------------------------------------------------------|--------------------------------------------------------------------------------------------------------------------------------------------------------------------------------------------------------------------------------------------------------------------------------------------------------------------------------------------------------------------------------------------------------------------------------------------------------------------------------------------------------------------------------------------------------------------------------|-----------------------------------------------------------------------------------------------------------------------------------------------------------------------------------------|----------------------|------------------|
|                              | ndhJ-K-C region                                                                                                                                                                                             | ndhF-D-E-G-I-A-H region                                                                                                                                                                                                                                                                                                                                                                                                                                                                                                                                                        | ndhB                                                                                                                                                                                    |                      |                  |
| <b>Apostasioideae</b>        |                                                                                                                                                                                                             |                                                                                                                                                                                                                                                                                                                                                                                                                                                                                                                                                                                |                                                                                                                                                                                         |                      |                  |
| <i>Apostasia shenzhenica</i> | >Unigene69269_Ap_fb<br>>Unigene87795_Ap_fb<br>>Unigene88477_Ap_fb<br>>Unigene23503_Ap_fb<br>>Unigene11539_Ap_fb<br>>Unigene90084_Ap_fb<br>>Unigene46738_Ap_fb<br>>Unigene28081_Ap_fb<br>>Unigene52144_Ap_fb | >Unigene41918_Ap_fb<br>>Unigene53823_Ap_fb<br>>Unigene72742_Ap_fb<br>>Unigene73556_Ap_fb<br>>Unigene76972_Ap_fb<br>>Unigene79556_Ap_fb<br>>Unigene81057_Ap_fb<br>>Unigene85689_Ap_fb                                                                                                                                                                                                                                                                                                                                                                                           | >Unigene29767_Ap_fb<br>>Unigene28875_Ap_fb<br>>Unigene79060_Ap_fb<br>>Unigene29163_Ap_fb<br>>Unigene2188_Ap_fb<br>>Unigene9034_Ap_fb<br>>Unigene3335_Ap_fb                              | mature flower buds   | Tsai et al. 2013 |
| <i>Neuwiedia malipoensis</i> | >Unigene117027_Ne_fb<br>>Unigene116386_Ne_fb<br>>Unigene80802_Ne_fb<br>>Unigene92339_Ne_fb                                                                                                                  | >Unigene116626_Ne_fb<br>>Unigene120297_Ne_fb<br>>Unigene129251_Ne_fb<br>>Unigene13695_Ne_fb<br>>Unigene139703_Ne_fb<br>>Unigene140737_Ne_fb<br>>Unigene143156_Ne_fb<br>>Unigene146834_Ne_fb<br>>Unigene148454_Ne_fb<br>>Unigene154307_Ne_fb<br>>Unigene157226_Ne_fb<br>>Unigene48454_Ne_fb<br>>Unigene65423_Ne_fb<br>>Unigene65942_Ne_fb<br>>Unigene66460_Ne_fb<br>>Unigene72149_Ne_fb<br>>Unigene73733_Ne_fb<br>>Unigene80484_Ne_fb<br>>Unigene84449_Ne_fb<br>>Unigene85091_Ne_fb<br>>Unigene86866_Ne_fb<br>>Unigene94366_Ne_fb<br>>Unigene96329_Ne_fb<br>>Unigene99485_Ne_fb | >Unigene156751_Ne_fb<br>>Unigene13393_Ne_fb<br>>Unigene28019_Ne_fb<br>>Unigene140983_Ne_fb<br>>Unigene156912_Ne_fb<br>>Unigene105627_Ne_fb<br>>Unigene43751_Ne_fb<br>>Unigene7472_Ne_fb | mature flower buds   | Tsai et al. 2013 |

| Species                         | <i>ndh</i> transcripts                                                                                                                                                                  |                                                                                                                                                                                                                                                                                                                                                               |                                                                                                                                                                                         | Material information | Reference        |
|---------------------------------|-----------------------------------------------------------------------------------------------------------------------------------------------------------------------------------------|---------------------------------------------------------------------------------------------------------------------------------------------------------------------------------------------------------------------------------------------------------------------------------------------------------------------------------------------------------------|-----------------------------------------------------------------------------------------------------------------------------------------------------------------------------------------|----------------------|------------------|
|                                 | ndhJ-K-C region                                                                                                                                                                         | ndhF-D-E-G-I-A-H region                                                                                                                                                                                                                                                                                                                                       | ndhB                                                                                                                                                                                    |                      |                  |
| <b><i>Cypripedioideae</i></b>   |                                                                                                                                                                                         |                                                                                                                                                                                                                                                                                                                                                               |                                                                                                                                                                                         |                      |                  |
| <i>Cypripedium singchii</i>     | >Unigene123012_Ch_fb<br>>Unigene126895_Ch_fb<br>>Unigene91373_Ch_fb<br>>Unigene124112_Ch_fb<br>>Unigene44022_Ch_fb<br>>Unigene54875_Ch_fb<br>>Unigene79119_Ch_fb<br>>Unigene64311_Ch_fb | >Unigene108704_Ch_fb<br>>Unigene86389_Ch_fb<br>>Unigene38615_Ch_fb<br>>Unigene132771_Ch_fb<br>>Unigene117910_Ch_fb<br>>Unigene110223_Ch_fb<br>>Unigene133375_Ch_fb<br>>Unigene117089_Ch_fb<br>>Unigene15981_Ch_fb<br>>Unigene120965_Ch_fb<br>>Unigene76575_Ch_fb<br>>Unigene117252_Ch_fb<br>>Unigene36780_Ch_fb<br>>Unigene50561_Ch_fb<br>>Unigene35987_Ch_fb | >Unigene81774_Ch_fb<br>>Unigene116499_Ch_fb<br>>Unigene76103_Ch_fb<br>>Unigene120814_Ch_fb<br>>Unigene78391_Ch_fb<br>>Unigene121760_Ch_fb                                               | mature flower buds   | Tsai et al. 2013 |
| <i>Paphiopedilum armeniacum</i> | >Unigene17537_Pa_fb<br>>Unigene19265_Pa_fb                                                                                                                                              | >Unigene117683_Pa_fb<br>>Unigene86259_Pa_fb<br>>Unigene105103_Pa_fb<br>>Unigene102973_Pa_fb<br>>Unigene90098_Pa_fb                                                                                                                                                                                                                                            | >Unigene105265_Pa_fb<br>>Unigene66033_Pa_fb<br>>Unigene102147_Pa_fb<br>>Unigene19856_Pa_fb<br>>Unigene102907_Pa_fb<br>>Unigene42239_Pa_fb<br>>Unigene57666_Pa_fb<br>>Unigene36063_Pa_fb | mature flower buds   | Tsai et al. 2013 |

| Species                    | <i>ndh</i> transcripts                                                                  |                                                                   |                                           | Material information    | Reference           |
|----------------------------|-----------------------------------------------------------------------------------------|-------------------------------------------------------------------|-------------------------------------------|-------------------------|---------------------|
|                            | ndhJ-K-C region                                                                         | ndhF-D-E-G-I-A-H region                                           | ndhB                                      |                         |                     |
| <b><i>Vanilloideae</i></b> |                                                                                         |                                                                   |                                           |                         |                     |
| <i>Vanilla planifolia</i>  | >scaffold-THDM-2043406-Vanilla_planifolia<br>>scaffold-THDM-2006247-Vanilla_planifolia  |                                                                   | >scaffold-THDM-2032069-Vanilla_planifolia | No material information | Johnson et al. 2012 |
| <i>Vanilla shenzhenica</i> | >Unigene147494_Va_fb<br>>Unigene123_Va_fb<br>>Unigene23174_Va_fb<br>>Unigene81512_Va_fb |                                                                   | >Unigene54646_Va_fb                       | mature flower buds      | Tsai et al. 2013    |
| <i>Galeola faberi</i>      | >Unigene71422_Ga_fb<br>>Unigene107437_Ga_fb<br>>Unigene20405_Ga_fb                      | >Unigene57147_Ga_fb<br>>Unigene27278_Ga_fb<br>>Unigene50721_Ga_fb |                                           | mature flower buds      | Tsai et al. 2013    |

| Species                    | <i>ndh</i> transcripts                    |                                           |                                           | Material information      | Reference           |
|----------------------------|-------------------------------------------|-------------------------------------------|-------------------------------------------|---------------------------|---------------------|
|                            | ndhJ-K-C region                           | ndhF-D-E-G-I-A-H region                   | ndhB                                      |                           |                     |
| <b>Orchidoideae</b>        |                                           |                                           |                                           |                           |                     |
| <i>Drakaea elastica</i>    | >scaffold-XZME-2073613-Drakaea_elastica   | >scaffold-XZME-2013708-Drakaea_elastica   | >scaffold-XZME-2067623-Drakaea_elastica   | leaves, flowers, and buds | Johnson et al. 2012 |
| <i>Goodyera pubescens</i>  | >scaffold-VTUS-2052198-Goodyera_pubescens | >scaffold-VTUS-2008714-Goodyera_pubescens | >scaffold-VTUS-2027247-Goodyera_pubescens | young leaves              | Johnson et al. 2012 |
|                            |                                           | >scaffold-VTUS-2049624-Goodyera_pubescens | >scaffold-VTUS-2017751-Goodyera_pubescens |                           |                     |
|                            |                                           | >scaffold-VTUS-2050414-Goodyera_pubescens | >scaffold-VTUS-2024711-Goodyera_pubescens |                           |                     |
|                            |                                           | >scaffold-VTUS-2044337-Goodyera_pubescens | >scaffold-VTUS-2026918-Goodyera_pubescens |                           |                     |
|                            |                                           | >scaffold-VTUS-2008713-Goodyera_pubescens | >scaffold-VTUS-2040139-Goodyera_pubescens |                           |                     |
|                            |                                           | >scaffold-VTUS-2043164-Goodyera_pubescens | >scaffold-VTUS-2010245-Goodyera_pubescens |                           |                     |
|                            |                                           | >scaffold-VTUS-2037255-Goodyera_pubescens | >scaffold-VTUS-2008415-Goodyera_pubescens |                           |                     |
| <i>Habenaria delavayi</i>  | >Unigene11883_Ha_fb                       | >Unigene103331_Ha_fb                      | >Unigene100905_Ha_fb                      | mature flower buds        | Tsai et al. 2013    |
|                            | >Unigene2826_Ha_fb                        | >Unigene104496_Ha_fb                      | >Unigene11008_Ha_fb                       |                           |                     |
|                            | >Unigene84798_Ha_fb                       | >Unigene105393_Ha_fb                      | >Unigene12605_Ha_fb                       |                           |                     |
|                            |                                           | >Unigene109799_Ha_fb                      | >Unigene1993_Ha_fb                        |                           |                     |
|                            |                                           | >Unigene29980_Ha_fb                       | >Unigene2468_Ha_fb                        |                           |                     |
|                            |                                           | >Unigene30495_Ha_fb                       | >Unigene45846_Ha_fb                       |                           |                     |
|                            |                                           | >Unigene38599_Ha_fb                       | >Unigene67111_Ha_fb                       |                           |                     |
|                            |                                           | >Unigene40484_Ha_fb                       |                                           |                           |                     |
|                            |                                           | >Unigene40484_Ha_fb                       |                                           |                           |                     |
|                            |                                           | >Unigene50000_Ha_fb                       |                                           |                           |                     |
|                            |                                           | >Unigene63124_Ha_fb                       |                                           |                           |                     |
|                            |                                           | >Unigene83484_Ha_fb                       |                                           |                           |                     |
|                            |                                           | >Unigene83500_Ha_fb                       |                                           |                           |                     |
|                            |                                           | >Unigene8483_Ha_fb                        |                                           |                           |                     |
|                            |                                           | >Unigene93473_Ha_fb                       |                                           |                           |                     |
|                            |                                           | >Unigene97680_Ha_fb                       |                                           |                           |                     |
|                            |                                           | >Unigene99504_Ha_fb                       |                                           |                           |                     |
| <i>Hemipilia forrestii</i> | >Unigene107848_Hem                        | >Unigene100534_Hem                        | >Unigene104501_Hem                        | mature flower buds        | Tsai et al. 2013    |
|                            | >Unigene95563_Hem                         | >Unigene104197_Hem                        | >Unigene64030_Hem                         |                           |                     |
|                            | >Unigene108373_Hem                        | >Unigene1054_Hem                          | >Unigene74470_Hem                         |                           |                     |
|                            | >Unigene24273_Hem                         | >Unigene107907_Hem                        | >Unigene8168_Hem                          |                           |                     |
|                            | >Unigene49469_Hem                         | >Unigene110892_Hem                        | >Unigene86982_Hem                         |                           |                     |
|                            |                                           | >Unigene17478_Hem                         | >Unigene89656_Hem                         |                           |                     |
|                            |                                           | >Unigene24809_Hem                         |                                           |                           |                     |
|                            |                                           | >Unigene29088_Hem                         |                                           |                           |                     |
|                            |                                           | >Unigene36004_Hem                         |                                           |                           |                     |
|                            |                                           | >Unigene37397_Hem                         |                                           |                           |                     |
|                            |                                           | >Unigene39152_Hem                         |                                           |                           |                     |
|                            |                                           | >Unigene39228_Hem                         |                                           |                           |                     |
|                            |                                           | >Unigene46424_Hem                         |                                           |                           |                     |
|                            |                                           | >Unigene53948_Hem                         |                                           |                           |                     |
|                            |                                           | >Unigene63135_Hem                         |                                           |                           |                     |
|                            |                                           | >Unigene6863_Hem                          |                                           |                           |                     |
|                            |                                           | >Unigene74818_Hem                         |                                           |                           |                     |
|                            |                                           | >Unigene7947_Hem                          |                                           |                           |                     |
|                            |                                           | >Unigene81760_Hem                         |                                           |                           |                     |
|                            |                                           | >Unigene82799_Hem                         |                                           |                           |                     |
|                            |                                           | >Unigene87191_Hem                         |                                           |                           |                     |

>Unigene91361\_Hem

>Unigene99622\_Hem

---

|                               |                                                 |                                               |                                               |              |                     |
|-------------------------------|-------------------------------------------------|-----------------------------------------------|-----------------------------------------------|--------------|---------------------|
| <i>Platanthera clavellata</i> | >scaffold-MTHW-2006569-Platanthera_clavellata   | >scaffold-MTHW-2054067-Platanthera_clavellata | >scaffold-MTHW-2005097-Platanthera_clavellata | young leaves | Johnson et al. 2012 |
|                               | >scaffold-MTHW-2012569-Platanthera_clavellata   | >scaffold-MTHW-2005096-Platanthera_clavellata |                                               |              |                     |
|                               | >scaffold-MTHW-2012285-Platanthera_clavellata   | >scaffold-MTHW-2033930-Platanthera_clavellata |                                               |              |                     |
|                               | >scaffold-MTHW-2002299-Platanthera_clavellata   | >scaffold-MTHW-2030317-Platanthera_clavellata |                                               |              |                     |
|                               | >scaffold-MTHW-2002298-Platanthera_clavellata   | >scaffold-MTHW-2002472-Platanthera_clavellata |                                               |              |                     |
|                               | >scaffold-MTHW-2044147-Platanthera_clavellata   | >scaffold-MTHW-2049556-Platanthera_clavellata |                                               |              |                     |
|                               | >scaffold-MTHW-2010146-Platanthera_clavellata_r | >scaffold-MTHW-2011571-Platanthera_clavellata |                                               |              |                     |
|                               | >scaffold-MTHW-2039772-Platanthera_clavellata   |                                               |                                               |              |                     |
|                               | >scaffold-MTHW-2048797-Platanthera_clavellata   |                                               |                                               |              |                     |
|                               | >scaffold-MTHW-2039314-Platanthera_clavellata   |                                               |                                               |              |                     |
|                               | >scaffold-MTHW-2038829-Platanthera_clavellata   |                                               |                                               |              |                     |
|                               | >scaffold-MTHW-2021258-Platanthera_clavellata   |                                               |                                               |              |                     |

---

| Species                       | <i>ndh</i> transcripts                                                          |                                                                                                                                                                                                                                                                                                                                                                                                                                                                                                        |                                                                                                | Material information          | Reference           |
|-------------------------------|---------------------------------------------------------------------------------|--------------------------------------------------------------------------------------------------------------------------------------------------------------------------------------------------------------------------------------------------------------------------------------------------------------------------------------------------------------------------------------------------------------------------------------------------------------------------------------------------------|------------------------------------------------------------------------------------------------|-------------------------------|---------------------|
|                               | ndhJ-K-C region                                                                 | ndhF-D-E-G-I-A-H region                                                                                                                                                                                                                                                                                                                                                                                                                                                                                | ndhB                                                                                           |                               |                     |
| Epidendroideae                |                                                                                 |                                                                                                                                                                                                                                                                                                                                                                                                                                                                                                        |                                                                                                |                               |                     |
| <i>Cymbidium sinense</i>      | >Unigene91693_Cym_fb<br>>Unigene58080_Cym_fb<br>>Unigene91202_Cym_fb            | >Unigene97292_Cym_fb<br>>Unigene95349_Cym_fb<br>>Unigene104107_Cym_fb<br>>Unigene53349_Cym_fb<br>>Unigene38535_Cym_fb<br>>Unigene96064_Cym_fb<br>>Unigene82889_Cym_fb<br>>Unigene78331_Cym_fb<br>>Unigene57645_Cym_fb<br>>Unigene98811_Cym_fb<br>>Unigene477_Cym_fb<br>>Unigene108035_Cym_fb                                                                                                                                                                                                           | >Unigene102171_Cym_fb<br>>Unigene108654_Cym_fb                                                 | mature flower buds            | Tsai et al. 2013    |
| <i>Erycina pusilla</i>        | >Unigene2294_All<br>>Unigene18133_All<br>>Unigene18740_All<br>>Unigene53575_All | >Unigene48484_All<br>>Unigene66487_All                                                                                                                                                                                                                                                                                                                                                                                                                                                                 | >Unigene56611_All<br>>Unigene63750_All                                                         | Root, leaves, flowers, fruits | Chou et al. 2013    |
| <i>Masdevallia yuangensis</i> | >scaffold-JSAG-2016102-Masdevallia_yuangen                                      | >scaffold-JSAG-2080352-Masdevallia_yuangensis<br>>scaffold-JSAG-2015140-Masdevallia_yuangensis<br>>scaffold-JSAG-2079074-Masdevallia_yuangensis<br>>scaffold-JSAG-2078946-Masdevallia_yuangensis<br>>scaffold-JSAG-2063713-Masdevallia_yuangensis<br>>scaffold-JSAG-2073565-Masdevallia_yuangensis<br>>scaffold-JSAG-2065747-Masdevallia_yuangensis<br>>scaffold-JSAG-2014459-Masdevallia_yuangensis<br>>scaffold-JSAG-2071180-Masdevallia_yuangensis<br>>scaffold-JSAG-2071180-Masdevallia_yuangensis | >scaffold-JSAG-2017126-Masdevallia_yuangensis<br>>scaffold-JSAG-2017125-Masdevallia_yuangensis | buds, leaves, roots           | Johnson et al. 2012 |
| <i>Phalaenopsis equestris</i> | >Unigene80637_Pe_fb<br>>Unigene76415_Pe_fb                                      | >Unigene70210_Pe_fb<br>>Unigene55346_Pe_fb<br>>Unigene82158_Pe_fb<br>>Unigene7851_Pe_fb<br>>Unigene91525_Pe_fb                                                                                                                                                                                                                                                                                                                                                                                         | >Unigene84064_Pe_fb<br>>Unigene93337_Pe_fb<br>>Unigene11847_Pe_fb                              | mature flower buds            | Tsai et al. 2013    |



**Supplementary Table S3. Plant cp *ndh* genes and their transfer to plant mt genomes.**

| Species                           | <i>ndh</i> genes |          |          |          |          |          |          |          |          |          |          |
|-----------------------------------|------------------|----------|----------|----------|----------|----------|----------|----------|----------|----------|----------|
|                                   | <i>F</i>         | <i>D</i> | <i>E</i> | <i>G</i> | <i>I</i> | <i>A</i> | <i>H</i> | <i>J</i> | <i>K</i> | <i>C</i> | <i>B</i> |
| <b>Chloroplast genome</b>         |                  |          |          |          |          |          |          |          |          |          |          |
| <b>Vanilloideae</b>               |                  |          |          |          |          |          |          |          |          |          |          |
| <i>Vanilla planifolia</i>         | -                | -        | -        | -        | -        | -        | -        | -        | -        | -        | 16       |
| <b>Cypripedioideae</b>            |                  |          |          |          |          |          |          |          |          |          |          |
| <i>Paphiopedilum armeniacum</i>   | -                | 78       | -        | -        | -        | -        | -        | 100      | 100      | 100      | 100      |
| <i>Paphiopedilum niveum</i>       | -                | 78       | -        | -        | -        | -        | -        | 100      | 100      | 100      | 100      |
| <i>Cypripedium formosanum</i>     | 100              | 100      | 100      | 100      | 100      | 100      | 100      | 100      | 100      | 100      | 100      |
| <b>Orchidoideae</b>               |                  |          |          |          |          |          |          |          |          |          |          |
| <i>Habenaria longidenticulata</i> | 100              | 100      | 100      | 100      | 100      | 100      | 100      | 100      | 100      | 100      | 100      |
| <i>Goodyera fumata</i>            | 100              | 100      | 100      | 100      | 100      | 100      | 100      | 100      | 100      | 100      | 100      |
| <b>Epidendroideae</b>             |                  |          |          |          |          |          |          |          |          |          |          |
| <i>Erycina pusilla</i>            | -                | 60       | -        | 52       | -        | -        | 32       | 42       | -        | 68       | 43       |
| <i>Oncidium 'Gower Ramsey'</i>    | -                | 65       | 99       | 100      | 48       | 40       | 15       | 43       | 13       | 100      | 99       |
| <i>Phalaenopsis equestris</i>     | -                | 50       | -        | 24       | 18       | -        | -        | 98       | 27       | 60       | 79       |
| <i>Cymbidium sinense*</i>         | 81               | 100      | 100      | 100      | 100      | 92       | 100      | 100      | 100      | 100      | 100      |
| <i>Masdevallia picturata</i>      | 100              | 100      | 100      | 100      | 100      | 100      | 100      | 100      | 100      | 100      | 100      |
| <b>Mitochondrial genome</b>       |                  |          |          |          |          |          |          |          |          |          |          |
| <b>Vanilloideae</b>               |                  |          |          |          |          |          |          |          |          |          |          |
| <i>Vanilla planifolia</i>         | -                | -        | 58       | -        | -        | -        | -        | 79       | 43       | 70       | -        |
| <b>Cypripedioideae</b>            |                  |          |          |          |          |          |          |          |          |          |          |
| <i>Paphiopedilum armeniacum</i>   | -                | 82       | -        | -        | -        | 49       | 98       | 100      | -        | 100      | 85       |
| <i>Paphiopedilum niveum</i>       | 50               | 80       | 50       | -        | -        | -        | 79       | 98       | 91       | 99       | 100      |
| <i>Cypripedium formosanum</i>     | -                | -        | -        | -        | -        | -        | -        | -        | -        | 63       | -        |
| <b>Orchidoideae</b>               |                  |          |          |          |          |          |          |          |          |          |          |
| <i>Habenaria longidenticulata</i> | 59               | 64       | -        | -        | -        | 36       | -        | -        | -        | -        | -        |
| <i>Goodyera fumata</i>            | -                | 35       | 100      | -        | 99       | 44       | 8        | 96       | -        | 80       | 7        |
| <b>Epidendroideae</b>             |                  |          |          |          |          |          |          |          |          |          |          |
| <i>Masdevallia picturata</i>      | 75               | 98       | 100      | 100      | 100      | 94       | 99       | -        | -        | 30       | 82       |
| <i>Erycina pusilla</i>            | 41               | 78       | 100      | 98       | 28       | 91       | 100      | 48       | -        | 96       | 50       |
| <i>Oncidium 'Gower Ramsey'</i>    | 70               | 30       | -        | -        | -        | -        | -        | -        | -        | -        | 97       |
| <b>Others</b>                     |                  |          |          |          |          |          |          |          |          |          |          |
| <i>Spirodela polyrhiza</i>        | -                | -        | -        | -        | -        | -        | -        | -        | 49       | 58       | -        |
| <i>Phoenix dactylifera</i>        | -                | -        | -        | -        | 100      | 44       | -        | 100      | 96       | -        | -        |
| <i>Bambusa oldhamii</i>           | -                | -        | -        | -        | -        | -        | -        | 100      | 87       | 48       | -        |
| <i>Oryza rufipogon</i>            | -                | -        | -        | -        | -        | -        | -        | 100      | 95       | 34       | -        |
| <i>Oryza sativa indica</i>        | -                | -        | -        | -        | -        | -        | -        | 100      | 95       | 34       | -        |
| <i>Oryza sativa japonica</i>      | -                | -        | -        | -        | -        | -        | -        | 100      | 95       | 34       | -        |
| <i>Triticum aestivum</i>          | -                | -        | -        | -        | -        | 26       | -        | -        | -        | -        | 100      |
| <i>Sorghum bicolor</i>            | -                | -        | -        | -        | 33       | -        | -        | -        | 88       | 98       | -        |
| <i>Tripsacum dactyloides</i>      | -                | -        | -        | -        | -        | -        | -        | -        | 20       | -        | 10       |
| <i>Zea mays</i>                   | -                | -        | -        | -        | -        | -        | -        | -        | 20       | -        | 100      |
| <i>Zea perennis</i>               | -                | -        | -        | -        | -        | -        | -        | -        | 20       | -        | 100      |
| <i>Amborella trichopoda</i>       | 87               | 97       | 98       | 99       | 100      | 49       | 100      | 99       | 99       | 100      | 100      |
| <i>Vitis vinifera</i>             | 91               | 100      | 99       | -        | -        | -        | 42       | -        | -        | -        | 16       |
| <i>Cucurbita pepo</i>             | 36               | 80       | 34       | 61       | -        | -        | 47       | -        | 85       | 64       | 93       |
| <i>Citrullus lanatus</i>          | -                | -        | -        | -        | -        | -        | -        | 99       | 98       | 100      | -        |
| <i>Cucumis melo</i>               | -                | -        | 36       | -        | 49       | 22       | -        | -        | -        | -        | -        |
| <i>Cucumis sativus</i>            | -                | 91       | 59       | 85       | 11       | -        | -        | 58       | -        | -        | 100      |
| <i>Beta macrocarpa</i>            | -                | -        | -        | -        | -        | -        | -        | -        | 83       | -        | -        |
| <i>Silene vulgaris</i>            | -                | 61       | -        | -        | -        | -        | -        | -        | -        | -        | -        |
| <i>Nicotiana tabacum</i>          | -                | -        | -        | -        | -        | -        | 12       | -        | -        | -        | 85       |
| <i>Carica papaya</i>              | -                | -        | -        | -        | -        | -        | -        | -        | -        | -        | 78       |
| <i>Boea hygrometrica</i>          | -                | -        | -        | -        | -        | -        | -        | 70       | 90       | 53       | 100      |

The light green rows of the table show the *ndh* genes in the orchid chloroplast genomes. The remainder of the table contains data from the available mitochondrial genomes. The numbers indicate the percentage of the nucleotide fragments that are similar to the *ndh* sequences.

The red numbers indicate that the *ndh* DNA is in frame and encodes the full-length *ndh* gene.

'-' indicates that there is no homolog in the mt genome.

**Supplementary Table S4. The accession numbers of the sequences that were identified in this report.**

**Chloroplast genome Sequences**

| Subfamily      | Name                              | Accession |
|----------------|-----------------------------------|-----------|
| Vanilloideae   | <i>Vanilla planifolia</i>         | KJ566306  |
| Cyripedioideae | <i>Cypripedium formosanum</i>     | KJ501998  |
|                | <i>Paphiopedilum armeniacum</i>   | KJ566307  |
|                | <i>Paphiopedilum niveum</i>       | KJ524105  |
| Orchidoideae   | <i>Goodyera fumata</i>            | KJ501999  |
|                | <i>Habenaria longidenticulata</i> | KJ524104  |
| Epidendroideae | <i>Masdevallia picturata</i>      | KJ566305  |

**Orchid *ndh* DNA sequences**

| Subfamily      | Species                      | Name                            | Accession               |
|----------------|------------------------------|---------------------------------|-------------------------|
| Cyripedioideae | <i>Paphiopedilum niveum</i>  | Paph_niveum_ndhB1               | KJ501931                |
|                |                              | Paph_niveum_ndhB2               | KJ501932                |
|                |                              | Paph_niveum_ndhB3               | KJ501933                |
|                |                              | Paph_niveum_ndhB4               | KJ501989                |
|                |                              | Paph_niveum_ndhB5               | KJ501934                |
|                |                              | Paph_niveum_ndhB6               | KJ501935                |
|                |                              | Paph_niveum_ndhB7               | KJ501936                |
|                |                              | Paph_niveum_ndhB8               | KJ501937                |
|                |                              | Paph_niveum_ndhE1               | KJ501938                |
|                |                              | Paph_niveum_ndhH                | KJ501939                |
|                |                              | Paph_niveum_ndhJKC2             | KJ501941                |
|                |                              | Paph_niveum_ndhJKC3             | KJ501942                |
|                |                              | Paph_niveum_ndhJ                | KJ501943                |
|                |                              | <i>Paphiopedilum armeniacum</i> | Paph_armeniaticum_ndhJC |
| Epidendroideae | <i>Masdevallia picturata</i> | Mas_ndhF                        | KJ501928                |
|                |                              | Mas_ndhJK                       | KJ501929                |

**Orchid mitochondria *ndh* DNA sequences**

| Subfamily      | Species                           | Name         | Accession |
|----------------|-----------------------------------|--------------|-----------|
| Vanilloideae   | <i>Vanilla planifolia</i>         | Vp-mt-ndhJ   | KJ501948  |
|                |                                   | Vp-mt-ndhK   | KJ501957  |
|                |                                   | Vp-mt-ndhC   | KJ501923  |
|                |                                   | Vp-mt-ndhE   | KJ501959  |
| Cyripedioideae | <i>Cypripedium formosanum</i>     | Cf-mt-ndhC   | KJ501922  |
|                |                                   | Cf-mt-ndhH   | KJ501956  |
|                |                                   | Pa-mt-ndhCD  | KJ501961  |
|                |                                   | Pa-mt-ndhAH  | KJ501962  |
|                |                                   | Pa-mt-ndhB   | KJ501951  |
|                |                                   | Pn-mt-ndhJKC | KJ501944  |
|                |                                   | Pn-mt-ndhD   | KJ501945  |
| Orchidoideae   | <i>Habenaria longidenticulata</i> | Ha-mt-ndhA   | KJ501960  |
|                |                                   | Ha-mt-ndhD   | KJ501926  |
|                |                                   | Ha-mt-ndhF   | KJ501954  |
|                | <i>Goodyera fumata</i>            | Go-mt-ndhH   | KJ501955  |
|                |                                   | Go-mt-ndhAIE | KJ501963  |
|                |                                   | Go-mt-ndhD   | KJ501927  |
|                |                                   | Go-mt-ndhB   | KJ501921  |
| Epidendroideae | <i>Erycina pusilla</i>            | Ep-mt-ndhJC  | KJ501950  |

|                |                                |                 |          |
|----------------|--------------------------------|-----------------|----------|
| Epidendroideae | <i>Erycina pusilla</i>         | Ep-mt-ndhC      | KJ501996 |
|                |                                | Ep-mt-ndhDEGIAH | KJ501958 |
|                |                                | Ep-mt-ndhDF     | KJ501966 |
|                |                                | Ep-mt-ndhD      | KJ501975 |
|                |                                | Ep-mt-ndhB      | KJ501994 |
|                | <i>Goodyera fumata</i>         | Go-mt-ndhJ      | KJ501949 |
|                |                                | Go-mt-ndhC      | KJ501924 |
|                | <i>Masdevallia picturata</i>   | Ma-mt-ndhC      | KJ501930 |
|                |                                | Ma-mt-ndhHAIGED | KJ501946 |
|                |                                | Ma-mt-ndhB      | KJ501947 |
|                | <i>Oncidium 'Gower Ramsey'</i> | Onc-mt-ndhF     | KJ501953 |
|                |                                | Onc-mt-ndhD     | KJ501925 |
|                |                                | Onc-mt-ndhB     | KJ501920 |

#### *Erycina pusilla* mitochondria BAC clone sequences

| Subfamily        | Species                | Name                   | Accession |
|------------------|------------------------|------------------------|-----------|
| Epidendroideae   | <i>Erycina pusilla</i> | Ep-mt-cp1_002O08_c1    | KJ501991  |
|                  |                        | Ep-mt-cp1_002O08_c2    | KJ501964  |
|                  |                        | Ep-mt-ndhC 180K03_c1   | KJ501978  |
|                  |                        | Ep-mt-ndhC 180K03_c2   | KJ501996  |
|                  |                        | Ep-mt-ndhC 180K03_c3   | KJ501997  |
|                  |                        | Ep-mt-cp2_163A04       | KJ501976  |
|                  |                        | Ep-mt-ndhD162P19       | KJ501975  |
|                  |                        | Ep-mt-cp3_123E16       | KJ501973  |
|                  |                        | Ep-mt-cp4_092M20_c1    | KJ501972  |
|                  |                        | Ep-mt-cp4_092M20_c2    | KJ501979  |
|                  |                        | Ep-mt-ndhB 089F15_c1   | KJ501993  |
|                  |                        | Ep-mt-ndhB 089F15_c2   | KJ501994  |
|                  |                        | Ep-mt-ndhB 089F15_c3   | KJ501995  |
|                  |                        | Ep-mt-cp5_041C10       | KJ501971  |
|                  |                        | Ep-mt-cp5_037I23       | KJ501970  |
|                  |                        | Ep-mt-ndhDEGIAH 037D12 | KJ501969  |
|                  |                        | Ep-mt-cp6_034M07       | KJ501992  |
|                  |                        | Ep-mt-cp7_024M14_c1    | KJ501967  |
|                  |                        | Ep-mt-cp7_024M14_c2    | KJ501968  |
|                  |                        | Ep-mt-ndhDF 015H07     | KJ501966  |
| Ep-mt-cp8_012N23 | KJ501965               |                        |           |

#### *Erycina pusilla* mitochondria cDNA sequences

| Subfamily      | Species                | Name    | Accession |
|----------------|------------------------|---------|-----------|
| Epidendroideae | <i>Erycina pusilla</i> | C211673 | KJ501980  |
|                |                        | C92325  | KJ501981  |
|                |                        | C13581  | KJ501982  |
|                |                        | C115515 | KJ501983  |
|                |                        | C117162 | KJ501984  |
|                |                        | C16074  | KJ501985  |
|                |                        | C122767 | KJ501986  |
|                |                        | C74904  | KJ501987  |
|                |                        | C167460 | KJ501988  |
|                |                        | C92859  | KJ501990  |
|                |                        | Ec16074 | KJ721582  |
|                |                        | C18219  | KJ721583  |

**Supplementary Table S5. Sequencing coverage of the seven assembled chloroplast genomes.**

| <b>Species</b>                    | <b>Total covered bases<br/>(bp)</b> | <b>Genome size<br/>(bp)</b> | <b>Coverage*</b> |
|-----------------------------------|-------------------------------------|-----------------------------|------------------|
| <b>Vanilloideae</b>               |                                     |                             |                  |
| <i>Vanilla planifolia</i>         | 127134011                           | 150127                      | 847              |
| <b>Cypripedioideae</b>            |                                     |                             |                  |
| <i>Cypripedium formosanum</i>     | 34236744                            | 180723                      | 189              |
| <i>Paphiopedilum armeniacum</i>   | 30040152                            | 165008                      | 182              |
| <i>Paphiopedilum niveum</i>       | 82923695                            | 161387                      | 514              |
| <b>Orchidoideae</b>               |                                     |                             |                  |
| <i>Goodyera fumata</i>            | 149360589                           | 157868                      | 946              |
| <i>Habenaria longidenticulata</i> | 126061558                           | 156152                      | 807              |
| <b>Epidendroideae</b>             |                                     |                             |                  |
| <i>Masdevallia picturata</i>      | 158689021                           | 158276                      | 1003             |

\*: The coverage was computed by BWA-aligning reads back to each chloroplast genome, summing the number of reads covered at each base using SAMtools, and dividing them by the genome size.

**Supplementary Table S6. Summary of the transcriptome, chloroplast and mitochondrial genome sequences of *Vanilla planifolia* (*ndh* deleted), *Paphiopedilum armeniacum* (*ndh* deleted), *Cypripedium formosanum* (*ndh* complete), *Habenaria longidenticulata*, *Goodyera fumata*, *Erycina pusilla* (*ndh* deleted) and *Masdevallia picturata* (*ndh* complete).**

| <i>ndh</i> gene                      | F   | D   | E   | G   | I   | A   | H   | J   | K   | C   | B   |
|--------------------------------------|-----|-----|-----|-----|-----|-----|-----|-----|-----|-----|-----|
| <b>Vanilloideae</b>                  |     |     |     |     |     |     |     |     |     |     |     |
| <i>Vanilla planifolia</i> cDNA       | -   | -   | -   | -   | -   | -   | -   | 25  | 15  | 44  | 8   |
| <i>Vanilla planifolia</i> cp         | -   | -   | -   | -   | -   | -   | -   | -   | -   | -   | 19  |
| <i>Vanilla planifolia</i> mt         | -   | -   | 59  | -   | -   | -   | -   | 81  | 46  | 69  | 99  |
| <b>Cypripedioideae</b>               |     |     |     |     |     |     |     |     |     |     |     |
| <i>Paphiopedilum armeniacum</i> cDNA | -   | 30  | -   | -   | -   | 6   | 80  | 100 | 100 | 100 | 62  |
| <i>Paphiopedilum armeniacum</i> cp   | -   | 78  | -   | -   | -   | -   | -   | 100 | 100 | 100 | 100 |
| <i>Paphiopedilum armeniacum</i> mt   | 55  | 78  | 60  | -   | -   | 60  | 98  | -   | -   | 78  | 85  |
| <i>Cypripedium singchii</i> cDNA     | 7   | 94  | 100 | 94  | 83  | 8   | 74  | 98  | 98  | 100 | 65  |
| <i>Cypripedium formosanum</i> cp     | 100 | 100 | 100 | 100 | 100 | 100 | 100 | 100 | 100 | 100 | 100 |
| <i>Cypripedium formosanum</i> mt     | 6   | -   | -   | -   | -   | -   | -   | -   | -   | 58  | -   |
| <b>Orchidoideae</b>                  |     |     |     |     |     |     |     |     |     |     |     |
| <i>Habenaria delavayi</i>            | 50  | 84  | 100 | 100 | 100 | 88  | 58  | 16  | 89  | 100 | 96  |
| <i>Habenaria longidenticulata</i> cp | 100 | 100 | 100 | 100 | 100 | 100 | 100 | 100 | 100 | 100 | 100 |
| <i>Habenaria longidenticulata</i> mt | 64  | 62  | 86  | -   | -   | 39  | -   | -   | -   | -   | -   |
| <i>Goodyera pubescens</i> cDNA       | 50  | 80  | 100 | 100 | 94  | 91  | 100 | 100 | 91  | 100 | 16  |
| <i>Goodyera fumata</i> cp            | 100 | 100 | 100 | 100 | 100 | 100 | 100 | 100 | 100 | 100 | 100 |
| <i>Goodyera fumata</i> mt            | -   | 36  | 100 | -   | 99  | 54  | 8   | 82  | 51  | 77  | 6   |
| <b>Epidendroideae</b>                |     |     |     |     |     |     |     |     |     |     |     |
| <i>Masdevallia yuangensis</i> cDNA   | 67  | 79  | 82  | 72  | 68  | 44  | 88  | 100 | 100 | 100 | 100 |
| <i>Masdevallia picturata</i> cp      | 100 | 100 | 100 | 100 | 100 | 100 | 100 | 100 | 100 | 100 | 100 |
| <i>Masdevallia picturata</i> mt      | -   | 99  | 100 | 100 | 98  | 93  | 99  |     |     | 30  | 84  |
| <i>Erycina pusilla</i> cDNA          | -   | 22  | -   | 44  | -   | -   | -   | 44  | -   | 91  | 26  |
| <i>Erycina pusilla</i> cp            | -   | 60  | -   | 52  | -   | -   | 32  | 42  | -   | 68  | 43  |
| <i>Erycina pusilla</i> mt            | 66  | 81  | 83  | 99  | 27  | 91  | 93  | 44  |     | 91  | 52  |

The numbers indicate the percentage of the nucleotide fragments that are similar to the *ndh* sequences. Red numbers indicate that the *ndh* DNA is in frame and encodes the full-length *ndh* gene.

**Supplemental Table S7. Mitochondrial-derived *ndh* transcripts.**

| <b><i>ndh</i></b> | <b>Species</b>                | <b>Transcript ID</b>  | <b>Reference</b>    |
|-------------------|-------------------------------|-----------------------|---------------------|
| <i>C</i>          | <i>Vanilla planifolia</i>     | scaffold-THDM-2006247 | Johnson et al. 2012 |
| <i>K</i>          | <i>Vanilla shenzhenica</i>    | Unigene123_Va_fb      | Tsai et al. 2013    |
| <i>C</i>          | <i>Phalaenopsis equestris</i> | Unigene17537_Pa       | Tsai et al. 2013    |
| <i>C</i>          | <i>Erycina pusilla</i>        | Unigene18133          | Chou et al. 2013    |
| <i>J</i>          | <i>Erycina pusilla</i>        | Unigene18740          | Chou et al. 2013    |
| <i>D</i>          | <i>Erycina pusilla</i>        | Unigene48484          | Chou et al. 2013    |
| <i>B</i>          | <i>Vanilla planifolia</i>     | scaffold-THDM-2032069 | Johnson et al. 2012 |

Supplementary Table S8. Summary of 68 cp-like mt gene fragments.

| Gene name    | BAC clone ID | Position start | Position end | Coverage  | RNA      | Protein | Note  |
|--------------|--------------|----------------|--------------|-----------|----------|---------|-------|
| <i>rps12</i> | KJ501975     | 9650           | 9767         | 26/123    | KJ501980 |         |       |
|              | KJ501994     | 44996          | 44766        | 76/123    | -        |         |       |
| <i>psbA</i>  | KJ501968     | 17868          | 16944        | 334/353   | -        |         |       |
| <i>matK</i>  | -            |                |              | 0/518     | -        |         |       |
| <i>rps16</i> | KJ501964     | 4875           | 5934         | 87/92     | KJ501981 |         |       |
|              | KJ501973     | 25866          | 24807        | 87/92     | KJ501981 |         |       |
| <i>psbK</i>  | KJ501970     | 15664          | 15483        | 61/61     | -        |         |       |
| <i>psbI</i>  | KJ501970     | 15247          | 15140        | 36/36     | ?        | +       | = cp  |
| <i>atpA</i>  | -            |                |              | 0/509     | -        |         |       |
| <i>atpF</i>  | -            |                |              | 0/184     |          |         |       |
| <i>atpH</i>  | KJ501970     | 10590          | 10781        | 64/81     | -        |         |       |
| <i>atpI</i>  | KJ501970     | 9127           | 9867         | 247/247   | -        |         | *     |
| <i>rps2</i>  | KJ501970     | 43441          | 44148        | 236/236   | -        | +       |       |
|              |              | 8463           | 8828         | 118/236   | -        |         |       |
| <i>rpoC2</i> | KJ501991     | 48917          | 49056        | 47/1385   | -        |         |       |
|              | KJ501970     | 39717          | 43208        | 1238/1385 | -        |         |       |
|              |              | 6979           | 8396         | 504/1385  | -        |         |       |
| <i>rpoC1</i> | KJ501991     | 46157          | 48720        | 680/680   | -        |         | indel |
| <i>rpoB</i>  | KJ501991     | 43024          | 46127        | 1070/1070 | -        |         | indel |
| <i>petN</i>  | KJ501991     | 40985          | 40899        | 29/29     | -        | +       |       |
| <i>psbM</i>  | KJ501991     | 40363          | 40464        | 34/34     | -        | -       | *     |
| <i>psbD</i>  | KJ501966     | 55970          | 56409        | 167/353   | -        |         |       |
|              | KJ501970     | 22390          | 22817        | 163/353   | -        |         |       |
|              | KJ501969     | 18498          | 18982        | 179/353   | -        |         |       |
|              | KJ501978     | 20972          | 21456        | 179/353   | -        |         |       |
| <i>psbC</i>  | KJ501969     | 19130          | 20279        | 407/407   | -        |         | indel |
|              | KJ501978     | 21604          | 22753        | 407/407   | -        |         | indel |
| <i>psbZ</i>  | KJ501969     | 20731          | 20907        | 62/62     | -        |         | *     |
|              | KJ501978     | 23205          | 23381        | 62/62     | -        |         | *     |
| <i>rps14</i> | KJ501969     | 21840          | 21562        | 96/100    | KJ501982 |         | *     |
|              | KJ501978     | 24314          | 24036        | 96/100    | KJ501982 |         | *     |
| <i>psaB</i>  | KJ501969     | 23734          | 21916        | 606/734   | -        |         |       |
|              | KJ501978     | 26208          | 24390        | 606/734   | -        |         |       |
| <i>psaA</i>  | KJ501969     | 25073          | 23784        | 430/750   | --       |         |       |
|              | KJ501978     | 27547          | 26258        | 430/750   | --       |         |       |
| <i>ycf3</i>  | -            |                |              | 0/168     |          |         |       |
| <i>rps4</i>  | -            |                |              | 0/201     |          |         |       |
| <i>atpE</i>  | KJ501972     | 13239          | 13637        | 133/133   | -        | +       |       |
|              | KJ501971     | 17639          | 17241        | 133/133   | -        | +       |       |
|              | KJ501991     | 13373          | 13771        | 133/133   | -        | +       |       |
|              | KJ501994     | 69656          | 69258        | 133/133   | -        | +       |       |
| <i>atpB</i>  | KJ501972     | 11781          | 13222        | 489/497   | --       |         | indel |
|              | KJ501971     | 19097          | 17656        | 489/497   | -        |         | indel |
|              | KJ501991     | 11915          | 13356        | 489/497   | -        |         | indel |
|              | KJ501994     | 71114          | 69673        | 489/497   | -        |         | indel |
| <i>rbcL</i>  | KJ501972     | 11037          | 9646         | 464/480   | KJ501983 |         | indel |
|              | KJ501971     | 19841          | 21232        | 464/480   | KJ501983 |         | indel |
|              | KJ501991     | 11171          | 9780         | 464/480   | KJ501983 |         | indel |
|              | KJ501994     | 71858          | 73249        | 464/480   | KJ501983 |         | indel |
| <i>accD</i>  | KJ501972     | 8962           | 7563         | 488/488   | KJ501984 |         | indel |
|              | KJ501971     | 21916          | 23315        | 488/488   | KJ501984 |         | indel |
|              | KJ501991     | 9096           | 7697         | 488/488   | KJ501984 |         | indel |
|              | KJ501994     | 73933          | 75332        | 488/488   | KJ501984 |         | indel |
| <i>psaI</i>  | -            |                |              | 0/36      | -        |         |       |
| <i>ycf4</i>  | KJ501972     | 6510           | 5959         | 184/184   | -        |         | *     |
|              | KJ501971     | 24368          | 24919        | 184/184   | -        |         | *     |
|              | KJ501991     | 6644           | 6093         | 184/184   | -        |         | *     |

|              |          |       |       |           |          |   |       |
|--------------|----------|-------|-------|-----------|----------|---|-------|
|              | KJ501994 | 76385 | 76936 | 184/184   | -        |   | *     |
| <i>cemA</i>  | KJ501972 | 2160  | 1483  | 229/229   | KJ721582 |   | *     |
|              | KJ501971 | 28718 | 29395 | 229/229   | KJ721582 |   | *     |
|              | KJ501991 | 2294  | 1617  | 229/229   | KJ721582 |   | *     |
|              | KJ501994 | 80735 | 81412 | 229/229   | KJ721582 |   | *     |
| <i>petA</i>  | -        |       |       | 0/320     | -        |   |       |
| <i>psbJ</i>  | -        |       |       | 0/40      | -        |   |       |
| <i>psbL</i>  | KJ501976 | 24797 | 24887 | 33/38     | KJ501986 |   |       |
| <i>psbF</i>  | KJ501976 | 24655 | 24771 | 39/39     | KJ501986 |   | *     |
| <i>psbE</i>  | KJ501976 | 24421 | 24636 | 78/83     | -        |   |       |
| <i>petL</i>  | KJ501973 | 20048 | 20140 | 31/31     | KJ501987 |   | *     |
| <i>petG</i>  | KJ501973 | 20325 | 20435 | 37/37     | KJ501987 |   | *     |
| <i>psaJ</i>  | KJ501975 | 12331 | 12212 | 44/44     | KJ501988 | + |       |
| <i>rpl33</i> | KJ501975 | 11746 | 11549 | 66/66     | -        |   | *     |
| <i>rps18</i> | KJ501975 | 11362 | 11051 | 104/104   | KJ501980 |   | *     |
| <i>rpl20</i> | KJ501975 | 10408 | 10717 | 103/120   | KJ501980 |   | indel |
| <i>rps12</i> | KJ501994 | 44996 | 44766 | 77/123    | -        |   |       |
|              | KJ501975 | 9650  | 9767  | 38/123    | KJ501980 |   |       |
| <i>clpP</i>  | KJ501975 | 7537  | 9533  | 202/202   | KJ501980 |   | indel |
| <i>psbB</i>  | KJ501975 | 6964  | 5509  | 508/508   | -        |   | indel |
| <i>psbT</i>  | KJ501975 | 5170  | 5066  | 35/35     | -        |   | *     |
| <i>psbN</i>  | KJ501975 | 4915  | 5043  | 43/43     | -        |   | *     |
| <i>psbH</i>  | KJ501975 | 4803  | 4585  | 73/73     | -        | + |       |
| <i>petB</i>  | KJ501975 | 3684  | 3071  | 214/217   | -        |   |       |
| <i>petD</i>  | KJ501968 | 18529 | 18096 | 148/163   | -        |   |       |
| <i>rpoA</i>  | KJ501976 | 23700 | 22817 | 315/339   | KJ501986 |   |       |
| <i>rps11</i> | KJ501976 | 24099 | 23777 | 136/138   | KJ501986 |   |       |
| <i>rpl36</i> | KJ501976 | 24351 | 24241 | 35/35     | KJ501986 | + |       |
| <i>infA</i>  | KJ501973 | 2763  | 2912  | 49/77     | -        |   |       |
|              |          | 24316 | 24414 | 32/77     | KJ501981 |   |       |
|              | KJ501964 | 6425  | 6327  | 32/77     | KJ501981 |   |       |
| <i>rps8</i>  | KJ501964 | 7376  | 7007  | 131/131   | KJ501981 |   | indel |
|              | KJ501973 | 2287  | 2637  | 122/131   | KJ501981 |   |       |
|              |          | 24149 | 24196 | 16/131    | -        |   |       |
| <i>rpl14</i> | KJ501973 | 1744  | 2109  | 122/122   | KJ501981 |   |       |
|              | KJ501964 | 7919  | 7554  | 122/122   | KJ501981 |   |       |
| <i>rpl16</i> | KJ501973 | 1219  | 1611  | 132/136   | KJ501981 |   |       |
|              | KJ501964 | 8444  | 8052  | 132/136   | KJ501981 |   |       |
| <i>rps3</i>  | KJ501973 | 46223 | 46399 | 59/219    | KJ501990 |   |       |
|              |          | 23730 | 24102 | 137/219   | KJ501990 |   |       |
|              | KJ501964 | 10641 | 10075 | 219/219   | KJ501990 |   | indel |
| <i>rpl22</i> | KJ501973 | 11059 | 10697 | 121/121   | KJ501990 | + |       |
|              | KJ501964 | 45805 | 46167 | 121/121   | KJ501990 | + |       |
| <i>rps19</i> | KJ501973 | 45343 | 45618 | 91/92     | KJ501990 |   |       |
|              | KJ501964 | 11521 | 11246 | 91/92     | KJ501990 |   |       |
| <i>rpl2</i>  | KJ501973 | 44668 | 45099 | 143/272   | KJ501990 |   |       |
|              | KJ501964 | 12196 | 11765 | 143/272   | KJ501990 |   |       |
| <i>rpl23</i> | KJ501968 | 9239  | 9469  | 77/93     | KJ721583 |   |       |
| <i>ycf2</i>  | KJ501994 | 34804 | 41254 | 2225/2225 | -        |   | indel |
| <i>rps7</i>  | KJ501994 | 44150 | 43707 | 154/155   | -        |   |       |
| <i>rpl32</i> | KJ501978 | 10929 | 10774 | 52/56     | -        |   |       |
|              | KJ501969 | 8455  | 8300  | 52/56     | -        |   |       |
| <i>ccsA</i>  | KJ501975 | 12929 | 13805 | 326/326   | KJ501988 |   | indel |
| <i>psaC</i>  | KJ501978 | 9344  | 9586  | 81/81     | -        | + |       |
|              | KJ501969 | 6870  | 7112  | 81/81     | -        | + |       |
| <i>rps15</i> | KJ501978 | 3922  | 4191  | 90/90     | -        | - | *     |
|              | KJ501969 | 1448  | 1717  | 90/90     | -        | - | *     |



**Supplementary Table S9. Mitochondria and chloroplast genome accession numbers in identifying the *ndh* genes and cp-like DNA from the published plant mt genomes.**

| Species                                    | mt DNA accession | cp DNA accession                                          |
|--------------------------------------------|------------------|-----------------------------------------------------------|
| <i>Amborella trichopoda</i>                | KF754803.1       | NC_005086.1                                               |
| <i>Anomodon rugelii</i>                    | NC_016121.1      | -                                                         |
| <i>Arabidopsis thaliana</i>                | NC_001284.2      | NC_000932.1                                               |
| <i>Bambusa oldhamii</i>                    | EU365401.1       | FJ970915.1                                                |
| <i>Beta macrocarpa</i>                     | NC_015994.1      | EF534108.1 ( <i>Beta vulgaris</i> )*                      |
| <i>Beta vulgaris</i>                       | BA000024.1       | EF534108.1                                                |
| <i>Boea hygrometrica</i>                   | NC_016741.1      | NC_016468.1                                               |
| <i>Brassica carinata</i>                   | NC_016120.1      | NC_016734.1 ( <i>Brassica napus</i> )                     |
| <i>Brassica juncea</i>                     | NC_016123.1      | NC_016734.1 ( <i>Brassica napus</i> )                     |
| <i>Brassica napus</i>                      | NC_008285.1      | NC_016734.1                                               |
| <i>Brassica oleracea</i>                   | NC_016118.1      | NC_016734.1 ( <i>Brassica napus</i> )                     |
| <i>Carica papaya</i>                       | NC_012116.1      | EU431223.1                                                |
| <i>Chlorokybus atmophyticus</i>            | NC_009630.1      | DQ422812.2                                                |
| <i>Citrullus lanatus</i>                   | NC_014043.1      | DQ865976.1 ( <i>Cucumis sativus</i> )                     |
| <i>Cucumis melo</i>                        | JF412792.1       | DQ865976.1 ( <i>Cucumis sativus</i> )                     |
| <i>Cucumis sativus</i>                     | HQ860792.1       | DQ865976.1                                                |
| <i>Cucurbita pepo</i>                      | NC_014050.1      | DQ865976.1 ( <i>Cucumis sativus</i> )                     |
| <i>Cycas taitungensis</i>                  | NC_010303.1      | NC_009618.1                                               |
| <i>Cymbidium sinense</i> *                 |                  | NC_021430.1                                               |
| <i>Cypripedium formosanum</i>              |                  | KJ501998                                                  |
| <i>Daucus carota</i>                       | NC_017855.1      | NC_008325.1                                               |
| <i>Erycina pusilla</i>                     |                  | NC_018114.1                                               |
| <i>Goodyera fumata</i>                     |                  | KJ501999                                                  |
| <i>Habenaria longidenticulata</i>          |                  | KJ524104                                                  |
| <i>Lotus japonicus</i>                     | NC_016743.2      | NC_002694.1                                               |
| <i>Marchantia polymorpha</i>               | NC_001660.1      | NC_001319.1                                               |
| <i>Masdevallia picturata</i>               |                  | KJ566305                                                  |
| <i>Megaceros aenigmaticus</i>              | NC_012651.1      | -                                                         |
| <i>Millettia pinnata</i>                   | NC_016742.1      | NC_016708.2                                               |
| <i>Nicotiana tabacum</i>                   | NC_006581.1      | Z00044.2                                                  |
| <i>Oncidium 'Gower Ramsey'</i>             |                  | NC_014056.1                                               |
| <i>Oryza rufipogon</i>                     | NC_013816.1      | AY522330.1 ( <i>Oryza sativa</i> subsp. <i>japonica</i> ) |
| <i>Oryza sativa</i> subsp. <i>indica</i>   | NC_007886.1      | AY522330.1 ( <i>Oryza sativa</i> subsp. <i>japonica</i> ) |
| <i>Oryza sativa</i> subsp. <i>japonica</i> | NC_011033.1      | AY522330.1                                                |
| <i>Paphiopedilum armeniacum</i>            |                  | KJ566307                                                  |
| <i>Paphiopedilum niveum</i>                |                  | KJ524105                                                  |
| <i>Phaeoceros laevis</i>                   | NC_013765.1      | -                                                         |
| <i>Phoenix dactylifera</i>                 | JN375330.1       | GU811709.2                                                |
| <i>Physcomitrella patens</i>               | NC_007945.1      | NC_005087.1                                               |
| <i>Pleurozia purpurea</i>                  | NC_013444.1      | -                                                         |
| <i>Ricinus communis</i>                    | NC_015141.1      | NC_016736.1                                               |
| <i>Silene latifolia</i>                    | NC_014487.1      | NC_016730.1                                               |
| <i>Silene vulgaris</i>                     | JF750427.1       | NC_016727.1                                               |
| <i>Sorghum bicolor</i>                     | NC_008360.1      | EF115542.1                                                |
| <i>Spirodela polyrhiza</i>                 | NC_017840.1      | NC_015891.1                                               |
| <i>Tripsacum dactyloides</i>               | NC_008362.1      | EF115542.1 ( <i>Sorghum bicolor</i> )                     |
| <i>Triticum aestivum</i>                   | NC_007579.1      | AB042240.3                                                |
| <i>Vanilla planifolia</i>                  |                  | KJ566306                                                  |
| <i>Vigna radiate</i>                       | NC_015121.1      | NC_013843.1                                               |
| <i>Vitis vinifera</i>                      | NC_012119.1      | DQ424856.1                                                |
| <i>Zea luxurians</i>                       | NC_008333.1      | AY928077.1 ( <i>Zea mays</i> )                            |
| <i>Zea mays</i>                            | NC_007982.1      | AY928077.1                                                |
| <i>Zea perennis</i>                        | NC_008331.1      | AY928077.1 ( <i>Zea mays</i> )                            |

- Unavailable

\* indicates there is no mt genome available. The mt genome of the species in parenthesis is used for further analysis

**Supplementary Table S10. Primer list for BAC clone screening.**

| <b>For BAC clone screening</b> |                       |                       |        |
|--------------------------------|-----------------------|-----------------------|--------|
| Sequence ID                    | Forward               | Reverse               | Clone  |
| Ep-mt-circle1-175J16           | TGGGGCATTAGTGAAAGGAT  | AAGCCTGCCAGCAAGCATT   | 175J16 |
| Ep-mt-circle2_162I22           | TCGCTATTTGATTTTCATCCT | GCACGAAAAAGTAACCAGAC  | 162I22 |
| Ep-mt- <i>ndhJC</i> _002O08    | TGCGCGGTACAAAGTTCA    | CCAGGCGAATTGTTAGGC    | 002O08 |
| Ep-mt-cp1_002O08               | GCCATGCAACCGGATAAG    | TAGCTCCGGGTCCAGAAA    | 002O08 |
| Ep-mt- <i>ndhC</i> _180K03     | TATATATGCCGGATGCTCTT  | TTATTCGGAGAGTCACCTTG  | 180K03 |
| Ep-mt-cp2_163A04               | TCGAGCTACCGCCCTATG    | TTGGCCGTAGAAGGATCG    | 163A04 |
| Ep-mt- <i>ndhD</i> _162P19     | TGATCCATTGCTAACATCAA  | TTTGTGTTGTCTTTCTGGTCC | 162P19 |
| Ep-mt-cp3_123E16               | TTTGCACTTTCATTCCTTTT  | GTCGGAGGAGGTTATTTCTT  | 123E16 |
| Ep-mt-cp4_092M20               | AGCAAGCTAACCTCTCGCTTT | TAAGTACCATTGCAGCGCCTA | 092M20 |
| Ep-mt- <i>ndhB</i> _089F15     | CAGACCTTTCCTCTTTTG TG | GAAACGAAGTGGATAACAGC  | 089F15 |
| Ep-mt-cp5_041C10               | AGAAACGCGAGGGAATCA    | TGGGGTGAGTTTGATTCAAGT | 041C10 |
| Ep-mt-cp5_037I23               | TAGTGGGAGGTCGCGAAG    | TCCCCACCCAAGTATT      | 037I23 |
| Ep-mt- <i>ndhDH</i> _037D12    | AAGTGACGCACTCTTTCATT  | GAGGCACCATTGTGACTAT   | 037D12 |
| Ep-mt-cp6_034M07               | GGAGGGAGAAGCGGAGTC    | CAGGGAGGTTCCGGGAAGT   | 034M07 |
| Ep-mt-cp7_024M14               | TGAAAATGCTCCTTTCTCAT  | GACATCGCTAGTCATCCATT  | 024M14 |
| Ep-mt- <i>ndhDF</i> _015H07    | AGAAACTGCAGTCGTTAAGC  | TTTGCTCTGATTAGGAGGAG  | 015H17 |
| Ep-mt-cp8_012N23               | GGAGAGCAGCTTCTTGAGTA  | GTACTGAACGGATTGGAATG  | 012N23 |

| <b>For circle form demonstration</b> |                       |                      |        |
|--------------------------------------|-----------------------|----------------------|--------|
| Sequence ID                          | Forward               | Reverse              | Clone  |
| Ep-mt-cp8_012N23                     | GAGGCAGGTGAGAGTCTTGG  | ACGCAAAGAGAGGTCGTGAT | 012N23 |
| Ep-mt- <i>ndhDH</i> _037D12          | TCCAGCTTTGAGGAAGCAAT  | TCAGCCCATGAGTCAGTGTC | 037D12 |
| Ep-mt-cp3_123E16                     | CGGTCACAAATTGGGAGAAT  | CATCCTTCCCTTTTTCCACA | 123E16 |
| Ep-mt-circle2_162I22                 | TCACTGATGGATTTCGGTCAA | AGTCACTCTCGACGGGAGAA | 162I22 |
| Ep-mt-cp2_163A04                     | AGCCTTAGTGCACCAACCAC  | TTAGGGCGAAACTGCCTATG | 163A04 |
| Ep-mt-circle1-175J16                 | GGACCGTCAACTCCAAGTGT  | TGGATAGGAAGAGGCATTGG | 175J16 |

## Supplemental Figure S1. Gene maps of orchid chloroplast genomes.

Genes on the outside of the map are transcribed clockwise whereas genes on the inside of the map are transcribed counterclockwise. Colors indicate genes with different functional groups. *Paphiopedilum niveum* and *Paphiopedilum armeniacum* have the same genome structure

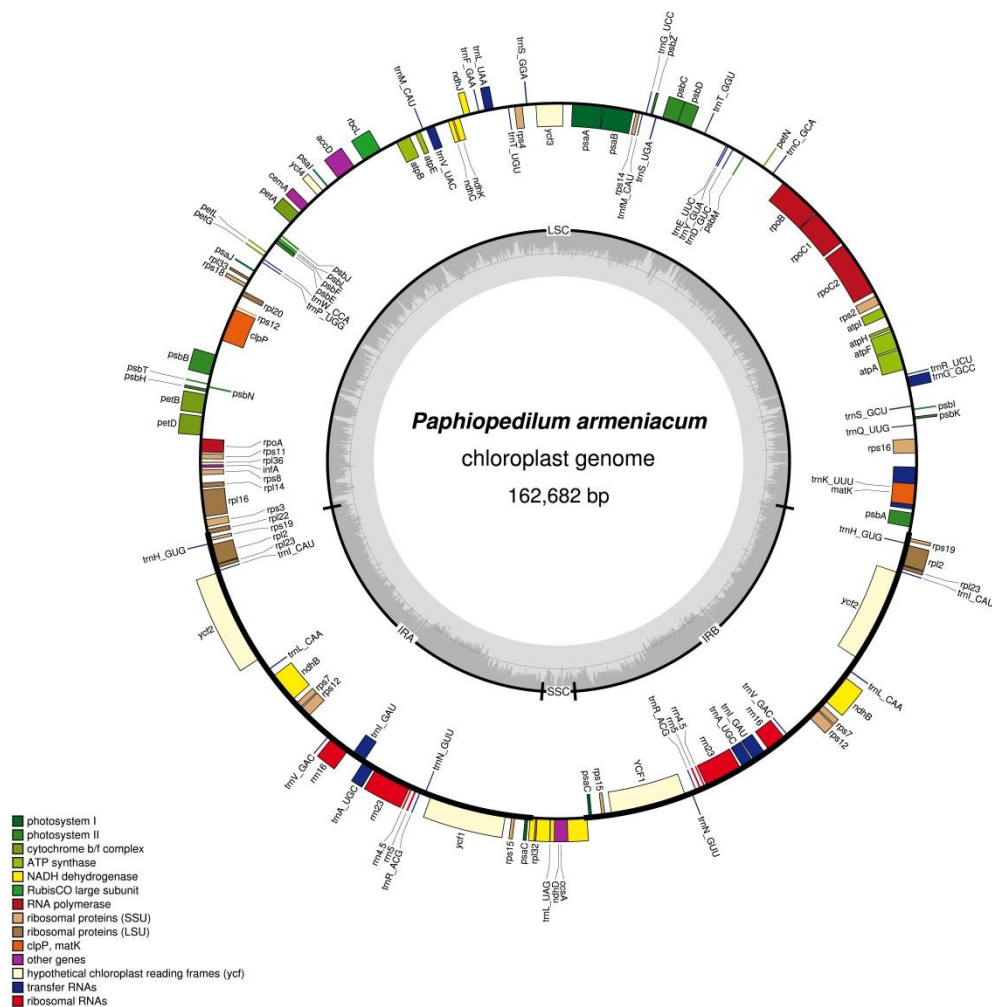

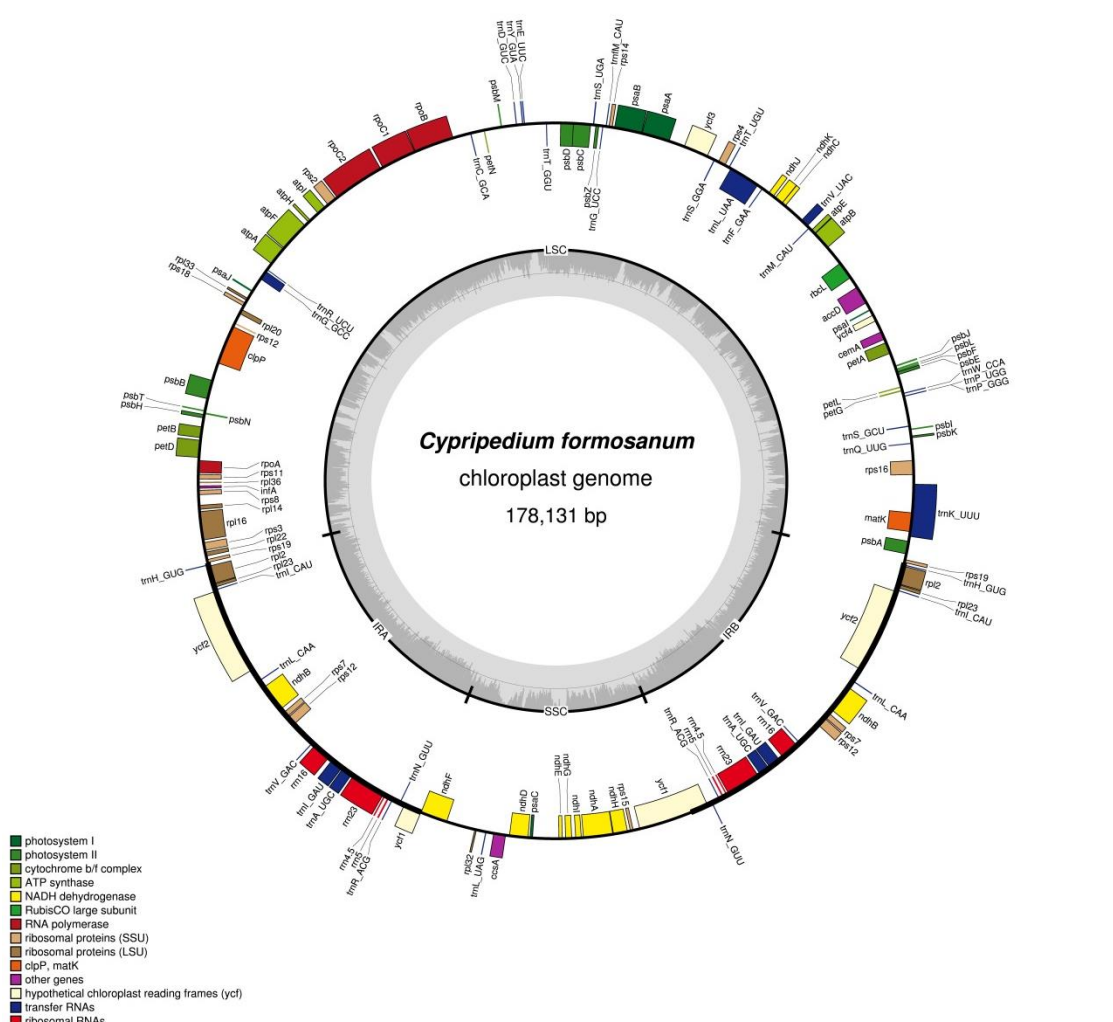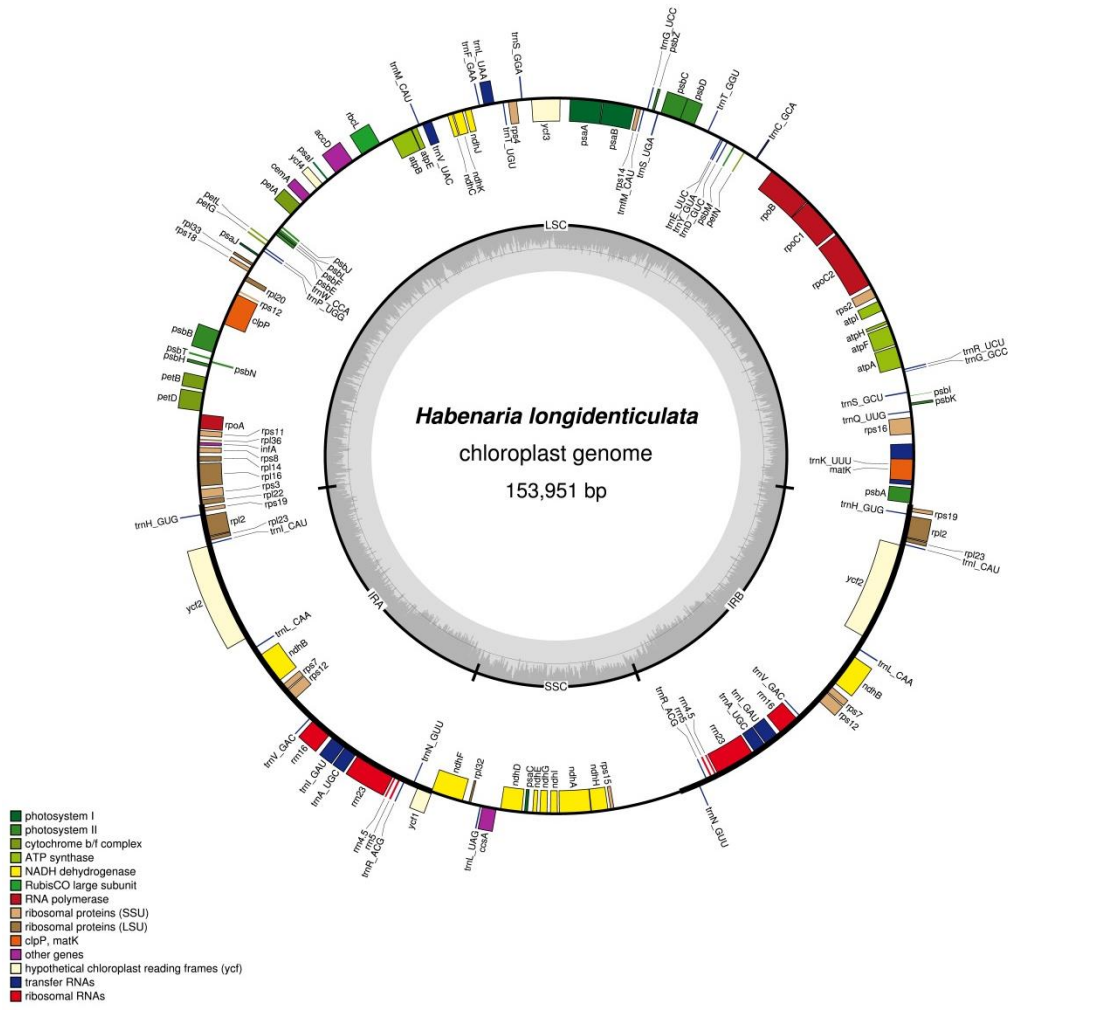

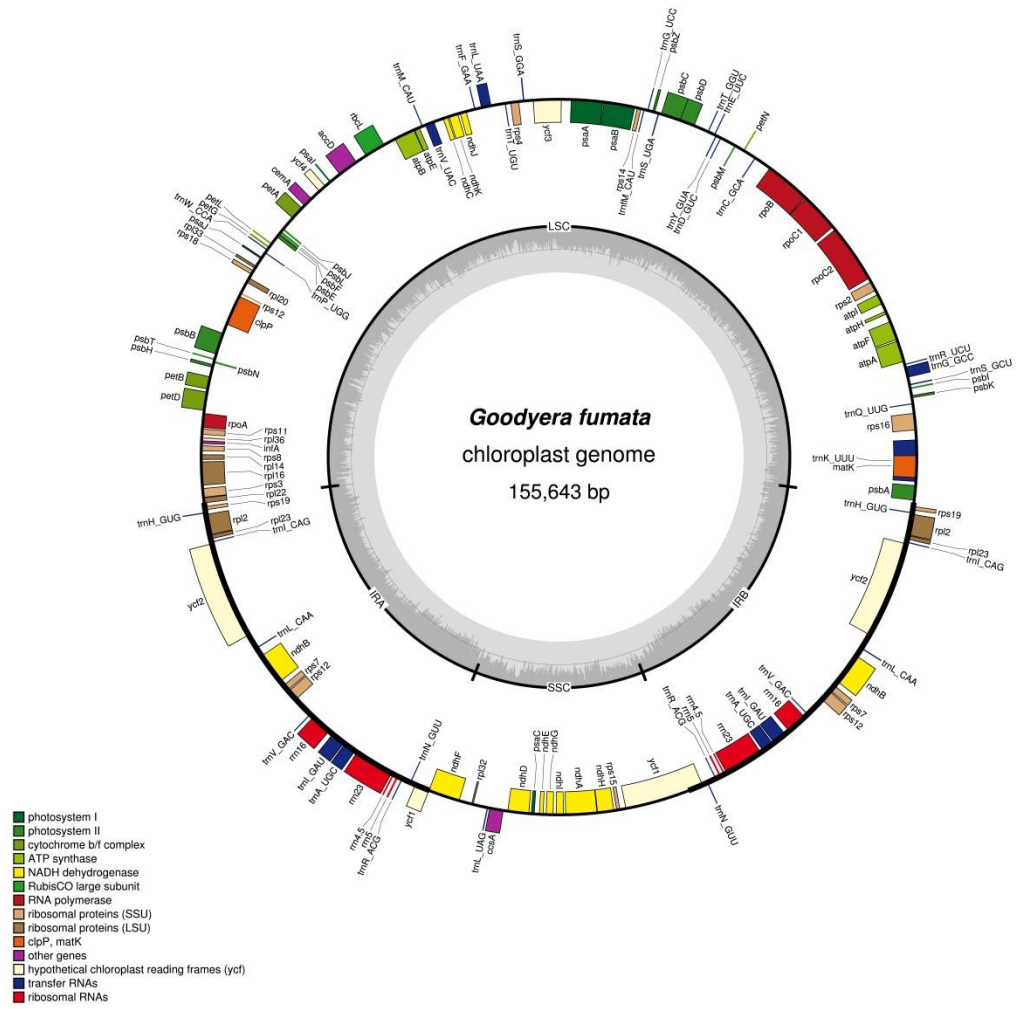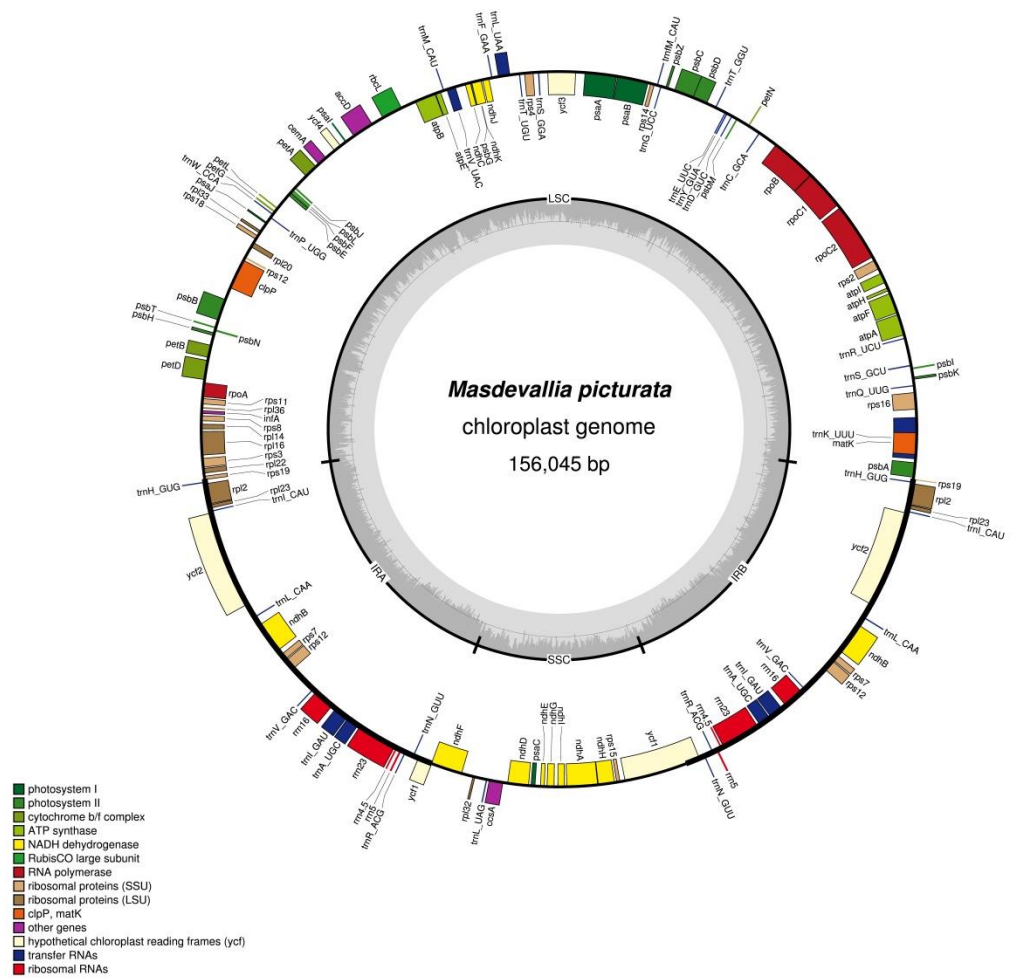

**Supplementary Figure S2. The cp *ndhJ-K-C* genes were transferred to the plant mt genome.** The boxes indicate the putative coding regions of the genes. The arrowheads indicate the direction of the genes. The accession no. of the sequences are listed in Supplementary Table S4.

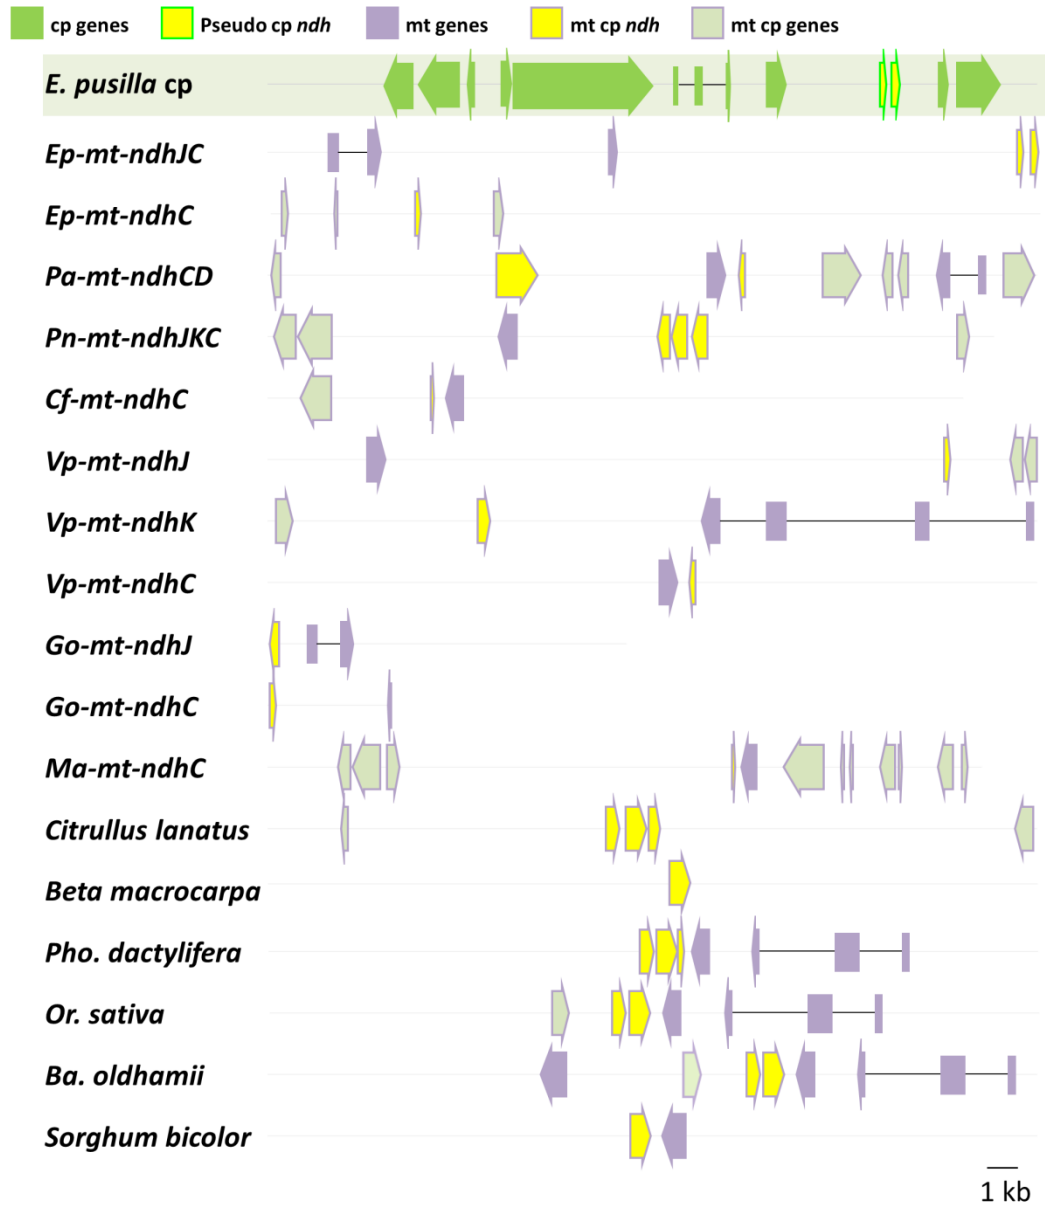

**Supplementary Figure S3. The cp *ndhF-D-E-G-I-A-H* region was transferred to the plant mt genome.** The boxes indicate the putative coding regions of the genes. The arrowheads indicate the direction of the genes. The accession no. of the sequences are listed in Supplementary Table S4.

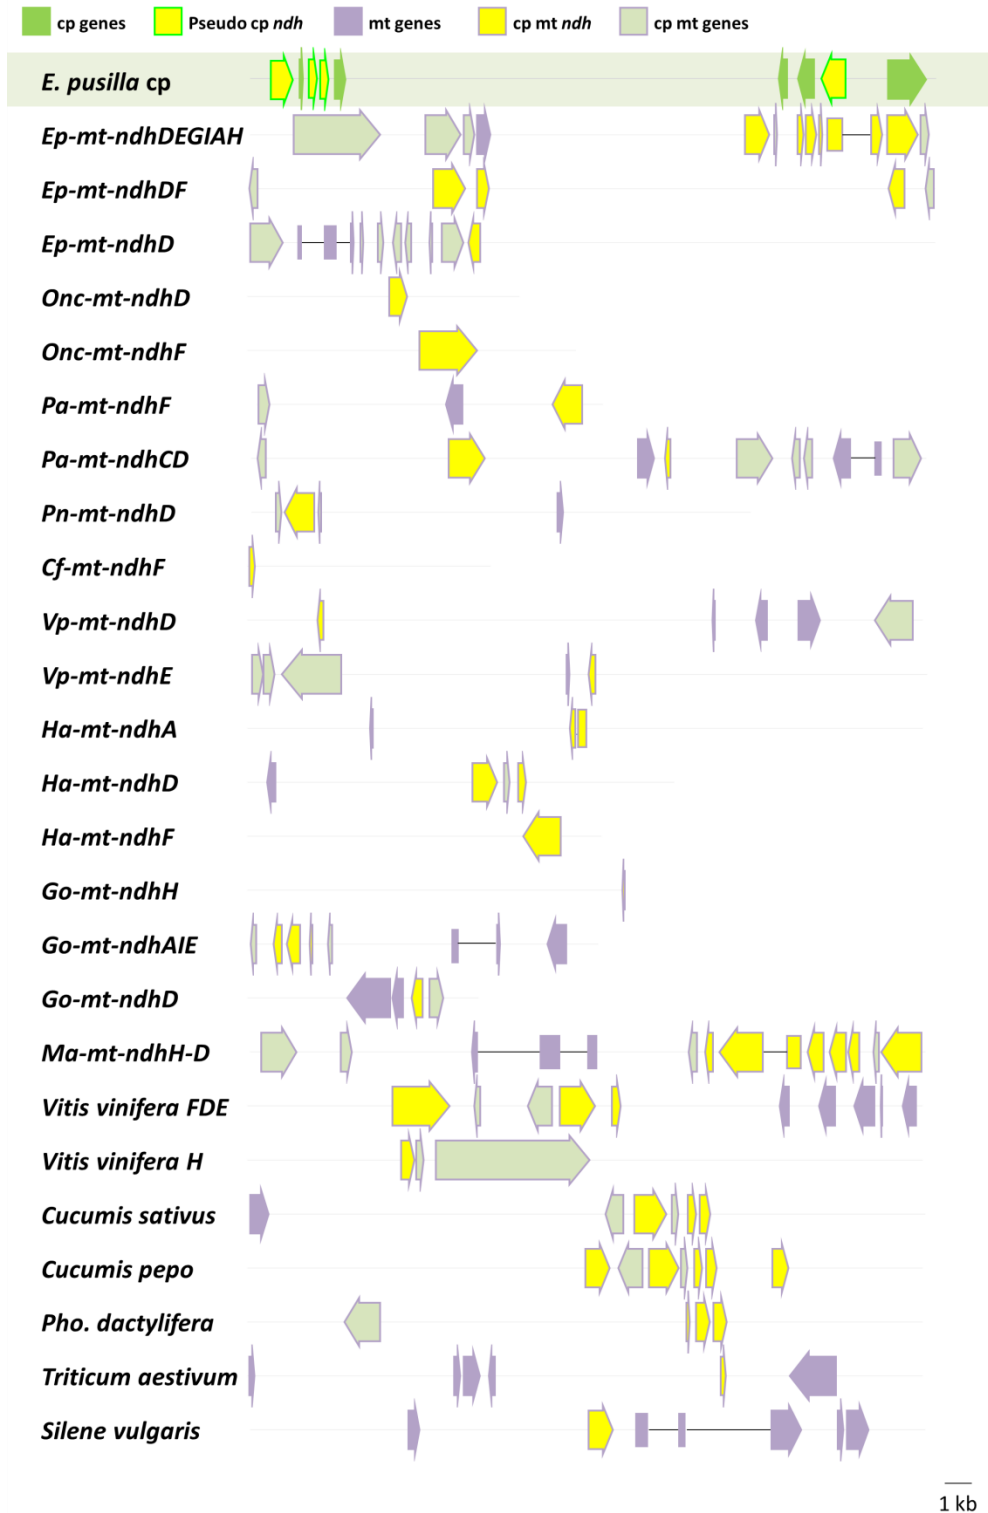

**Supplementary Figure S4. The cp *ndhB* gene fragment was transferred to the plant mt genome.** The boxes indicate the putative coding regions of the genes. The arrowheads indicate the direction of the genes. The accession no. of the sequences are listed in Supplementary Table S4.

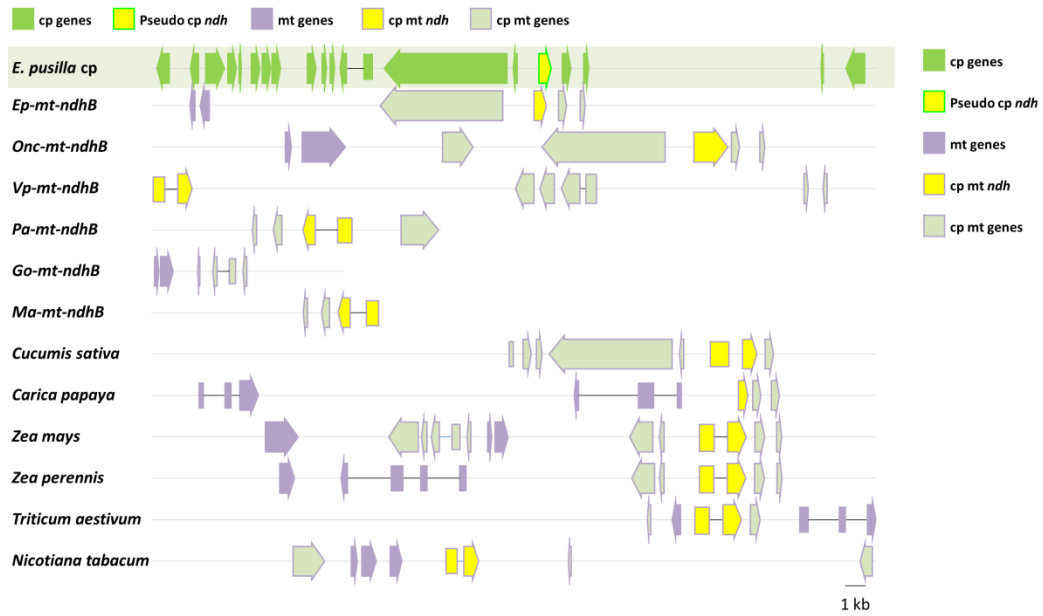



Supplementary Figure S5. Flow chart of sequence annotation.

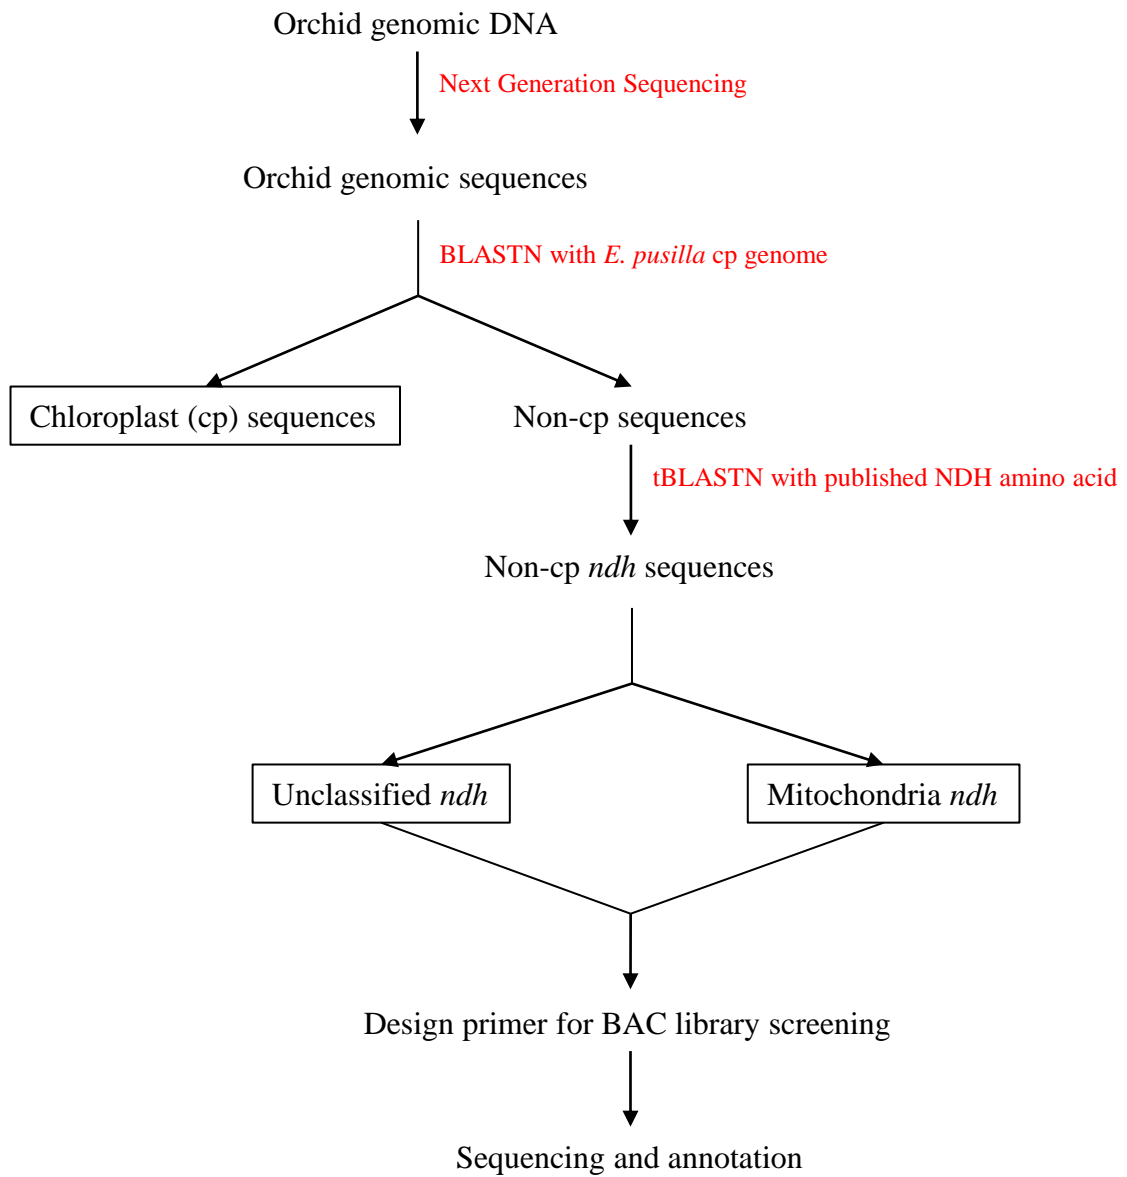

Supplement: srep09040-s1.pdf [file srep09040-s1.pdf]
